[Click here to view linked References](#)

# A multicenter, randomized study of decitabine as epigenetic priming with induction chemotherapy in children with AML

Lia Gore,<sup>1</sup> Timothy J. Triche, Jr.,<sup>2</sup> Jason E. Farrar,<sup>3</sup> Daniel Wai,<sup>4</sup> Christophe Legendre,<sup>5</sup> Gerald C Gooden,<sup>2,5</sup> Winnie S. Liang,<sup>5</sup> John Carpten,<sup>5</sup> David Lee,<sup>6</sup> Frank Alvaro,<sup>7</sup> Margaret E. Macy,<sup>1</sup> Carola Arndt,<sup>8</sup> Philip Barnette,<sup>9</sup> Todd Cooper,<sup>10</sup> Laura Martin,<sup>11</sup> Aru Narendran,<sup>12</sup> Jessica Pollard,<sup>13</sup> Soheil Meshinchi,<sup>14</sup> Jessica Boklan,<sup>15</sup> Robert J Arceci\*,<sup>4,6,15</sup> and Bodour Salhia\*,<sup>2,5</sup>

Children's Hospital Colorado and University of Colorado School of Medicine, Aurora CO<sup>1</sup>; Jane Anne Nohl Division of Hematology, Keck Medicine of USC and Norris Comprehensive Cancer Center, Los Angeles, CA<sup>2</sup>; Arkansas Children's Research Institute and University of Arkansas for Medical Sciences, Little Rock, AR<sup>3</sup>; Ron Matricaria Institute of Molecular Medicine, Phoenix, AZ<sup>4</sup>; Translational Genomics Research Institute, Phoenix, AZ<sup>5</sup>; Sidney Kimmel Comprehensive Cancer Center at Johns Hopkins' University, Baltimore MD<sup>6</sup>; John Hunter Hospital, New South Wales, Australia<sup>7</sup>; Mayo Clinic, Rochester MN<sup>8</sup>; Primary Children's Medical Center and the University of Utah, Salt Lake City UT<sup>9</sup>; Children's Healthcare of Atlanta, Atlanta GA<sup>10</sup>; Nationwide Children's Hospital, Columbus OH<sup>11</sup>; Alberta Children's Hospital and University of Calgary, Calgary, AB, Canada<sup>12</sup>; Seattle Children's Hospital<sup>13</sup> Seattle, WA and Fred Hutchinson Cancer Research Center<sup>14</sup>, Seattle WA; Phoenix Children's Hospital, Phoenix, AZ<sup>15</sup>

[lia.gore@ucdenver.edu](mailto:lia.gore@ucdenver.edu), [tim.triche@gmail.com](mailto:tim.triche@gmail.com), [JEFarrar@uams.edu](mailto:JEFarrar@uams.edu), [dwai@phoenixchildrens.com](mailto:dwai@phoenixchildrens.com), [clegendre@tgen.org](mailto:clegendre@tgen.org), [ggooden@usc.edu](mailto:ggooden@usc.edu), [wliang@tgen.org](mailto:wliang@tgen.org), [carpten@usc.edu](mailto:carpten@usc.edu), [davidwlee@email.arizona.edu](mailto:davidwlee@email.arizona.edu), [frank.alvaro@hnehealth.nsw.gov.au](mailto:frank.alvaro@hnehealth.nsw.gov.au), [Margaret.macy@childrenscolorado.org](mailto:Margaret.macy@childrenscolorado.org), [carndt@mayo.edu](mailto:carndt@mayo.edu), [Phillip.barnette@imail.org](mailto:Phillip.barnette@imail.org), [Todd.Cooper@seattlechildrens.org](mailto:Todd.Cooper@seattlechildrens.org), [laura.martin@nationwidechildrens.org](mailto:laura.martin@nationwidechildrens.org), [anarendr@ucalgary.edu](mailto:anarendr@ucalgary.edu), [jpollard@mmc.org](mailto:jpollard@mmc.org), [smeshinc@fhcrc.org](mailto:smeshinc@fhcrc.org), [jboklan@phoenixchildrens.com](mailto:jboklan@phoenixchildrens.com), [arcecro@gmail.com](mailto:arcecro@gmail.com), [salhia@usc.edu](mailto:salhia@usc.edu)

\*These authors contributed equally to this work.

Corresponding Author: Lia Gore, MD  
Center for Cancer and Blood Disorders  
Children's Hospital Colorado  
13123 East 16<sup>th</sup> Av, Box B115  
Aurora CO 80045  
Tel: 720-777-6458  
Fax: 720-777-7339  
[lia.gore@ucdenver.edu](mailto:lia.gore@ucdenver.edu)

1  
2  
3  
4  
5  
6  
7  
8  
9  
10  
11  
12  
13  
14  
15  
16  
17  
18  
19  
20  
21  
22  
23  
24  
25  
26  
27  
28  
29  
30  
31  
32  
33  
34  
35  
36  
37  
38  
39  
40  
41  
42  
43  
44  
45  
46  
47  
48  
49  
50  
51  
52  
53  
54  
55  
56  
57  
58  
59  
60  
61  
62  
63  
64  
65

## 43 **ABSTRACT**

44 **Background:** Decitabine is a deoxycytidine nucleoside derivative inhibitor of DNA-  
45 methyltransferases, which has been studied extensively and is approved for  
46 myelodysplastic syndrome in adults but with less focus in children. Accordingly, we  
47 conducted a phase 1 multicenter, randomized, open-label study to evaluate decitabine  
48 pre-treatment before standard induction therapy in children with newly diagnosed AML to  
49 assess safety and tolerability and explore a number of biologic endpoints.

50 **Results:** Twenty-four patients were fully assessable for all study objectives per protocol  
51 (10 in Arm A, 14 in Arm B). All patients experienced neutropenia and thrombocytopenia.  
52 The most common grade 3 and 4 non-hematologic adverse events observed were  
53 gastrointestinal toxicities and hypophosphatemia. Plasma decitabine PK were similar to  
54 previously reported adult data. Overall CR/CRi was similar for the two arms. MRD  
55 negativity at end-induction was 85% in Arm A versus 67% in Arm B patients. DNA  
56 methylation measured in peripheral blood over the course of treatment tracked with blast  
57 clearance and matched marrow aspirates at day 0 and day 21. Unlike end-point marrow  
58 analyses, promoter methylation in blood identified an apparent reversal of response in  
59 the lone treatment failure, one week prior to the patient's marrow aspirate confirming  
60 non-response. Decitabine-induced effects of end-induction marrows in Arm A were  
61 reflected by changes in DNA methylation and gene expression comparison with matched  
62 paired marrow diagnostic aspirates.

63 **Conclusions:** This first-in-pediatrics trial demonstrates that decitabine prior to standard  
64 combination chemotherapy is feasible and well tolerated in children with newly  
65 diagnosed AML. Pre-treatment with decitabine may represent a newer therapeutic  
66 option for pediatric AML, especially as it appears to induce important epigenetic

1  
2  
3  
4  
5  
6  
7  
8  
9  
10  
11  
12  
13  
14  
15  
16  
17  
18  
19  
20  
21  
22  
23  
24  
25  
26  
27  
28  
29  
30  
31  
32  
33  
34  
35  
36  
37  
38  
39  
40  
41  
42  
43  
44  
45  
46  
47  
48  
49  
50  
51  
52  
53  
54  
55  
56  
57  
58  
59  
60  
61  
62  
63  
64  
65

67 alterations. The novel biological correlates studied in this trial offer a clinically relevant  
68 window into disease progression and remission. Additional studies are needed to  
69 definitively assess whether decitabine can enhance durability responses in children with  
70 AML. This trial was registered at [www.clinicaltrials.gov](http://www.clinicaltrials.gov) as NCT01177540.

71 **Keywords:** AML, epigenetics, pediatrics, pharmacokinetics, pharmacodynamics,  
72 promoter methylation, repeat element transcription

73

## 74 **BACKGROUND**

75 Attaining complete response/remission (CR) is currently considered the essential  
76 first step in the effective treatment of acute myelogenous leukemia (AML). Historically,  
77 the most widely used induction therapy included seven days of cytarabine plus three  
78 days of anthracycline (known as “7+3”). With this approach, 75-80% of children with  
79 AML achieve CR (1-3). Subsequently, the addition of a third agent such as etoposide to  
80 7+3 (ADE) along with expanded supportive care measures, has led to higher remission  
81 induction rates of approximately 85%. Of patients who do not attain remission,  
82 approximately one-half have resistant leukemia and a substantial proportion will die from  
83 complications of the disease or treatment. Thus, there is a need to develop new  
84 treatment strategies to improve outcomes for these patients.

85 Pediatric tumors have been shown to have lower mutation burdens than adult  
86 tumors and many of these mutations occur in the plethora of known epigenetic  
87 complexes (4). In addition, significant aberrant DNA methylation is also observed in  
88 pediatric cancers such as AML including in patients with the poorest risk sub-types (5).  
89 These studies argue for the importance of identifying novel epigenetic therapies that

1  
2  
3  
4 90 target both histone and/or DNA methylation modifications. Specifically, reversal of  
5  
6 91 promoter DNA hypermethylation and associated gene silencing is an attractive  
7  
8 92 therapeutic approach in adult cancers. The DNA methylation inhibitors decitabine and  
9  
10 93 azacitidine are efficacious for hematological neoplasms at lower, less toxic, doses (6).  
11  
12 94 Experimentally, high doses induce rapid DNA damage and cytotoxicity, which do not  
13  
14 95 explain the prolonged response observed in adult patients (6). Studies have consistently  
15  
16 96 shown that transient low doses of DNA demethylating agents exert durable anti-tumor  
17  
18 97 effects on hematological and epithelial tumor cells (6). Moreover, studies have  
19  
20 98 demonstrated that DNA hypomethylating agents can sensitize resistant cancer cells to  
21  
22 99 cytotoxic agents *in vitro* and *in vivo* (7-15) and can enhance chemosensitivity of human  
23  
24 100 leukemia cells to cytarabine (16). Therefore, pretreatment with a DNA hypomethylating  
25  
26 101 agent may increase the efficacy of pediatric AML induction therapy (17). However, to  
27  
28 102 date there are no studies to demonstrate the safety, tolerability, or any signal of efficacy  
29  
30 103 of decitabine in combination with conventional multi-agent chemotherapy for AML in  
31  
32 104 children. We report here the first phase 1 clinical evaluation of decitabine in children  
33  
34 105 with newly diagnosed AML as a feasibility study to determine the safety, tolerability, and  
35  
36 106 preliminary efficacy when used as epigenetic pretreatment before induction  
37  
38 107 chemotherapy. In addition to assessing toxicity and morphologic remission, this study  
39  
40 108 examined decitabine pharmacokinetics and minimal residual disease (MRD) impact. We  
41  
42 109 also performed global DNA methylation and RNA-seq analyses to examine how  
43  
44 110 decitabine priming impacted the methylome and gene expression in end-induction  
45  
46 111 marrows when compared with matched diagnostic marrow baseline controls. We  
47  
48 112 believe that this feasibility study was essential prior to longer-term studies assessing  
49  
50 113 whether epigenetic-directed therapy in pediatric AML can lead to enhanced response  
51  
52 114 rates or more durable responses.  
53  
54  
55  
56  
57  
58  
59  
60  
61  
62  
63  
64  
65

## 115 **PATIENTS, MATERIALS, AND METHODS**

### 116 ***Patient eligibility***

117 Eligible patients were 1 to 16 years of age (inclusive), had histologically  
118 confirmed *de novo* AML with >20% bone marrow blasts and adequate cardiac function  
119 (defined as ejection fraction >50% or shortening fraction >26%). Patients with acute  
120 promyelocytic leukemia (FAB M3 subtype), symptomatic CNS involvement, white blood  
121 cell count over 100,000/ $\mu$ l, significant renal or hepatic disease, any prior chemotherapy  
122 or radiation therapy for AML, known HIV infection, history of CML, congenital syndromes  
123 known to predispose to AML (for example, Down syndrome, Fanconi anemia, Kostmann  
124 syndrome, or Diamond-Blackfan anemia) were excluded.

125 The study protocol was approved by the institutional review boards at  
126 participating sites and was conducted in accordance with the Declaration of Helsinki,  
127 Good Clinical Practice, and all local and federal regulatory guidelines. A parent or legal  
128 guardian provided written informed consent, with patient assent as appropriate  
129 according to institutional requirements.

### 130 ***Study design***

131 This multicenter, open-label study randomized patients to one of two arms: either  
132 five days of decitabine followed by standard induction chemotherapy with cytarabine,  
133 daunorubicin, and etoposide (Arm A=DADE), or standard induction chemotherapy with  
134 cytarabine, daunorubicin, and etoposide without decitabine (Arm B=ADE). The trial was  
135 listed under ClinicalTrials.gov identifier: NCT00943553. Twenty-five children age 1-16  
136 years with newly diagnosed *de novo* AML were randomized to receive either Arm A or  
137 Arm B. Given the feasibility nature of the study, sample size was selected based on the  
138 likelihood of how many patients might be accrued in a reasonable time frame so that  
139 future studies could be planned. Patients were stratified by age group and then

1  
2  
3  
4 140 randomized within each stratum in a 1:1 ratio by an Interactive Voice Response System  
5  
6 141 via a random number generator. Three age strata were used: 1 to <2 years, 2-11 years,  
7  
8 142 and 12-16 years, with efforts made to balance enrollment among the age groups.  
9

10 143 All patients received one cycle of study treatment in the absence of clinically  
11  
12 144 significant disease progression, unacceptable toxicity, or patient/guardian choice to  
13  
14 145 discontinue participation. Patients were not pre-medicated prior to the first dose of  
15  
16 146 decitabine; however, all other supportive care measures were allowed according to  
17  
18 147 institutional standards. Following the completion of the study therapy, therapy continued  
19  
20 148 at the treating physician's discretion.  
21  
22  
23

24 149 Treatment was administered to patients in hospital, and hospitalization through  
25  
26 150 count recovery was mandated. The dose and schedule of decitabine used in this study  
27  
28 151 was known to be safe and tolerable in adults and was known to induce adequate  
29  
30 152 hypomethylation (18, 19), inhibit DNA methyltransferase, and induce tumor suppressor  
31  
32 153 gene activation as early as 3-5 days following initiation. Treatment included: a)  
33  
34 154 decitabine 20 mg/m<sup>2</sup> IV infusion for 1 hour daily for 5 days (Arm A) on Days 1-5; b) age-  
35  
36 155 based dosing of intrathecal cytarabine (1 to <2 years: 30 mg; 2 to <3 years: 50 mg;  $\geq$ 3  
37  
38 156 years: 70 mg) at the time of diagnostic lumbar puncture or on Day 1; c) cytarabine 100  
39  
40 157 mg/m<sup>2</sup>/dose (3.3 mg/kg/dose for BSA <0.6 m<sup>2</sup>) slow IV push over 15 minutes, every 12  
41  
42 158 hours for 10 days on Days 1-10 (Arm B) or Days 6 to 15 (Arm A); d) daunorubicin 50  
43  
44 159 mg/m<sup>2</sup> (1.67 mg/kg/dose for BSA <0.6 m<sup>2</sup>) IV over 6 hours for 3 days on Days 1, 3, 5  
45  
46 160 (Arm B) or Days 6, 8 and 10 (Arm A); and e) etoposide 100 mg/m<sup>2</sup>/dose (3.3  
47  
48 161 mg/kg/dose for BSA <0.6 m<sup>2</sup>) IV over 4 hours for 5 days on Days 1-5 (Arm B) or Days 6-  
49  
50 162 10 (Arm A).  
51  
52  
53  
54

55 163 Toxicity was graded according to the National Cancer Institute Common  
56  
57 164 Terminology Criteria for Adverse Events (CTCAE), version 4.0 (<http://ctep.cancer.gov>;  
58  
59 165 National Cancer Institute, Bethesda, MD). Treatment-related toxicity was defined as  
60  
61  
62  
63  
64  
65

1  
2  
3  
4 166 non-resolving grade 3 or grade 4 non-hematologic or hematologic toxicity or time to  
5  
6 167 platelet recovery to  $\geq 100,000/\mu\text{l}$  and neutrophil recovery to  $\geq 1,000/\mu\text{l}$  more than 55 days  
7  
8 168 from the last day of induction chemotherapy in the absence of leukemia. Events  
9  
10 169 considered by the investigator to be possibly, probably, or definitely related to decitabine  
11  
12 170 were considered treatment-related toxicity.

### 15 171 ***Safety assessments***

17 172 Induction mortality was defined as death occurring within six weeks following  
18  
19 173 initial diagnosis of AML. An independent Data Safety and Monitoring Board assessed  
20  
21 174 the first 12 patients enrolled. This Board remained active for continuous analyses and  
22  
23 175 recommendations throughout the conduct of the study. Stopping rules were included in  
24  
25 176 the protocol to ensure appropriate safety of participants and that in the event of  
26  
27 177 unacceptable toxicity additional patients would not be placed at risk. All investigators  
28  
29 178 had access to the primary clinical trial data.

### 33 179 ***On-study evaluations***

35 180 Required assessments included physical examinations and recording of adverse  
36  
37 181 events at screening/baseline, on day 5, and at the completion of study therapy.  
38  
39 182 Required hematology and serum chemistry assessments were performed on days 1, 2,  
40  
41 183 6, 7, 14, 15, and weekly thereafter. Bone marrow evaluations for morphology, MRD and  
42  
43 184 molecular analyses were performed at screening/baseline, 3-4 weeks following the  
44  
45 185 completion of induction chemotherapy regardless of peripheral blood count recovery,  
46  
47 186 and then as clinically indicated until count recovery. Any clinically appropriate  
48  
49 187 assessment or test was allowed at the treating physician's discretion to maintain  
50  
51 188 standards of care.

### 56 189 ***Efficacy assessments***

58 190 The primary efficacy variable was Complete Response (CR), defined by the  
59  
60 191 International Working Group 2003 criteria (20), requiring patients to have a morphologic

1  
2  
3  
4 192 leukemia-free state and an absolute neutrophil count > 1000/ $\mu$ L and platelets of  
5  
6 193 >100,000/ $\mu$ L. Neither hemoglobin nor hematocrit was considered to have bearing on  
7  
8  
9 194 response although patients were required to be red blood cell transfusion independent to  
10  
11 195 enroll. Secondary efficacy variables included Leukemia-Free Survival (LFS), Overall  
12  
13 196 Survival (OS), methylation of DNA following decitabine therapy, times to platelet and  
14  
15 197 neutrophil recovery, and level of minimal residual disease at the end of induction  
16  
17  
18 198 therapy. LFS and OS were assessed on patients every three months until disease  
19  
20 199 progression, death, or loss to follow up. MRD analysis was performed at the post-  
21  
22 200 induction therapy assessment by multi-parameter flow immunophenotyping. Due to the  
23  
24 201 small sample size, statistical analyses were primarily descriptive.

#### 27 202 ***Pharmacokinetic evaluations***

28  
29 203 Serial blood samples (2 mL each) were drawn from all patients randomized to  
30  
31 204 Arm A at pre-decitabine, 30, 60 (just prior to end of infusion), 65, 90, 120, and 180  
32  
33 205 minutes after the start of decitabine infusion. A separate line was used to draw PK  
34  
35 206 samples not in proximity (i.e., not the contralateral lumen of a double lumen line) to the  
36  
37  
38 207 decitabine infusion. Samples were collected in EDTA tubes containing  
39  
40 208 tetrahydrouridine, a cytidine deaminase inhibitor, to prevent decitabine degradation, and  
41  
42 209 were centrifuged at 4C within 30 minutes of collection. Plasma was harvested and  
43  
44 210 stored frozen at -70 to -80C and shipped on dry ice for central analysis.

45  
46  
47 211 Pharmacokinetic parameters were calculated from plasma decitabine  
48  
49 212 concentration-time data by non-compartmental methods using Phoenix WinNonlin  
50  
51 213 version 6.2 (Pharsight Corporation, Mountain View, CA). The maximum plasma  
52  
53 214 concentration ( $C_{max}$ ) and the time at which  $C_{max}$  occurred ( $T_{max}$ ) were determined by  
54  
55 215 inspection of the individual data. AUC from time 0 until the last quantifiable  
56  
57  
58 216 concentration ( $AUC_{0-\tau}$ ) was determined by the linear up-log down trapezoidal rule. The



1  
2  
3  
4 217 terminal phase elimination rate constant ( $K_{el}$ ) was estimated from the slope of the  
5  
6 218 concentration-time data during the log-linear terminal phase using least square  
7  
8 219 regression analysis. The terminal phase elimination half-life ( $t_{1/2}$ ) was calculated using  
9  
10 220 the formula  $0.693/K_{el}$ . The AUC-time curve from 0 to infinity ( $AUC_{0-\infty}$ ) was computed  
11  
12 221 as  $AUC_{0-t}$  plus the extrapolation from the last quantifiable concentration,  $C_t$ , to infinity  
13  
14 222 using the formula  $C_t/K_{el}$ . Total body clearance ( $CL_p$ ) was calculated by the formula  
15  
16 223  $Dose/AUC_{0-\infty}$ . The volume of distribution at steady state ( $V_{dss}$ ) was calculated using  
17  
18 224 the formula  $CL_p \times MRT$ . Area under the first moment curve (AUMC) was determined  
19  
20 225 using the linear trapezoidal rule to calculate  $AUMC_{0-\tau}$  and extrapolated to infinity as  
21  
22 226  $AUMC_{0-\tau} + t * C_t/(K_{el})^2$ . The formula used to determine mean residence time (MRT)  
23  
24 227 was  $[AUMC/AUC_{0-\infty} - \tau/2]$ , where  $\tau$  is the duration of infusion.  
25  
26  
27

## 28 **DNA methylation analysis**

29  
30  
31 229 Bone marrow and blood samples were obtained from all patients at baseline and  
32  
33 230 at completion of induction therapy. In addition, blood samples were also collected on  
34  
35 231 days 7 and 14. DNA was extracted from marrow or peripheral blood lymphocytes (buffy  
36  
37 232 coat) using Qiagen's AllPrep kit from samples enriched for leukemic blasts by standard  
38  
39 233 Ficoll separation. Global DNA methylation was evaluated using the Infinium® Human  
40  
41 234 Methylation450® BeadChip Array according to the manufacturer's protocol (Illumina,  
42  
43 235 San Diego, CA) and as previously described (21). A total of 18 paired patient samples  
44  
45 236 with both diagnostic and remission bone marrows (9 pairs from Arm A and 9 pairs from  
46  
47 237 Arm B, totaling 36 samples) were used for DNA methylation analyses. In addition,  
48  
49 238 peripheral blood DNA from all time points was also analyzed. DNA Methylation levels  
50  
51 239 for each CpG residue are presented as  $\beta$  values, estimating the ratio of the methylated  
52  
53 240 signal intensity over the sum of the methylated and unmethylated intensities at each  
54  
55 241 locus. The average  $\beta$  value reports a methylation signal ranging from 0 to 1  
56  
57 242 representing completely unmethylated to completely methylated values, respectively.  
58  
59  
60  
61  
62  
63  
64  
65

1  
2  
3  
4 243 DNA methylation data were preprocessed using the Illumina Methylation Analyzer (IMA;  
5  
6 244 doi: 10.1093/bioinformatics/bts013), including background and probe design corrections,  
7  
8 245 quantile normalization and logit transformation. Loci with detection p-values >0.05 in  
9  
10 246 25% of samples, on sex chromosomes, or within 10 bp of putative SNPs were removed  
11  
12 247 from analysis. Differential methylation analysis was performed by IMA. A paired  
13  
14 248 Wilcoxon rank test was conducted to compare end-induction marrows with diagnostic  
15  
16 249 marrows within each arm. Probes with  $p < 0.05$  having group-wise differences in  $\beta$   
17  
18 250 values of at least 0.15 were considered statistically significant and differentially  
19  
20 251 methylated. Differentially methylated loci were visualized on a heat map and separation  
21  
22 252 of groups was assessed by hierarchical cluster analysis using Manhattan distance and  
23  
24 253 Ward's method. Unsupervised clustering was also performed on the top 0.1% most  
25  
26 254 variable probes by standard deviation. The DNA methylation data discussed here were  
27  
28 255 deposited in NCBI Gene Expression Omnibus Database and are accessible through  
29  
30 256 GEO Series accession number GSE78963.

### 31 257 ***RNA sequencing analysis***

32  
33  
34  
35  
36  
37 258 Total RNA was isolated using Qiagen's AllPrep kit and used to generate whole  
38  
39 259 transcriptome libraries using Nugen's Ovation RNA-Seq System v2 and KAPA  
40  
41 260 Biosystems' Library Preparation Kit with Illumina adapters. Equimolar libraries were  
42  
43 261 pooled and used to generate clusters on Illumina HiSeq Paired End v3 flowcells on the  
44  
45 262 Illumina cBot using Illumina's TruSeq PE Cluster Kit v3. Clustered flowcells were  
46  
47 263 sequenced by synthesis on the Illumina HiSeq 2000 using paired-end technology and  
48  
49 264 Illumina's TruSeq SBS Kit, extending to 83 bp for each of two reads and a 7bp index  
50  
51 265 read. Approximately 75-100M reads per library were targeted for generation. Following  
52  
53 266 sequencing, BCL files were converted to FASTQs using Illumina BCLConverter tool.  
54  
55 267 FASTQ alignments were performed using Star to generate individual BAM files.  
56  
57 268 Cufflinks/Cuffdiff and DEseq2 were used to identify differentially expressed transcripts.  
58  
59  
60  
61  
62  
63  
64  
65

1  
2  
3  
4 269 Annotations were based on Gencode version 3 (ENSEMBL) build 37.1. The RNA-seq  
5  
6 270 data discussed in this publication have been deposited in NCBI's Gene Expression  
7  
8 271 Omnibus, and are also accessible through the GEO series accession GSE78963  
9

### 10 272 ***Analysis of repeat element transcription***

11  
12  
13 273 Kallisto (22) was used to quantify abundance of transcripts using ENSEMBL  
14  
15 274 build 80 and human repeat exemplars from RepBase 20\_07 (23). Transcripts were  
16  
17 275 quantified in units of transcripts per million (TPM). The resulting estimates were  
18  
19 276 imported using the Artemis package (24) and annotated for presentation using TxDbLite  
20  
21 277 (25), the latter providing a "best fit" alignment of RepeatMasker and RepBase element-  
22  
23  
24 278 wise repeat phylogeny.

### 25 279 ***Pathway analysis***

26  
27  
28 280 Gene lists of interest were uploaded into IPA (Ingenuity® Systems, Redwood  
29  
30 281 City, CA) and the Core Analysis workflow was run with default parameters. Core  
31  
32 282 Analysis provides an assessment of significantly altered pathways, molecular networks  
33  
34 283 and biological processes represented in the samples' gene list.  
35  
36  
37  
38 284

## 39 40 285 **RESULTS**

### 41 286 ***Patients***

42  
43  
44 287 Twenty-five patients, aged 1-16 years (median 8.0 years) with WBC at diagnosis  
45  
46 288 ranging from 1.19-58.09 x 10<sup>3</sup>/μL were randomized between March and November  
47  
48 289 2011. Two patients did not receive the full induction regimen due to toxicity. As shown  
49  
50 290 in **Table 1**, 24 were fully assessable for all study objectives per protocol (10 in Arm A, 14  
51  
52 291 in Arm B). Three patients had confirmed FLT3 internal tandem duplications, all with an  
53  
54 292 allelic ratio of ≥0.5 and one had a FLT3 D835 point mutation. Two patients had NPM1  
55  
56 293 mutations and two patients had CEBPA mutations. No patients had mutations of TET2,  
57  
58  
59  
60  
61  
62  
63  
64  
65

1  
2  
3  
4 294 IDH1, IDH2, or C-CBL exons 8 or 9. One patient each had a KIT exon 8 (N822K) and  
5  
6 295 17 (D816H) mutation. Three patients had WT1 exon 7 mutations and one patient had a  
7  
8 296 WT1 exon 9 mutation. On relative dose intensity analysis, patients received 99-100% of  
9  
10 297 the intended doses of decitabine, daunorubicin, and etoposide and 84% of the intended  
11  
12 298 doses of cytarabine.

13  
14  
15 299

16  
17  
18 300 **Table 1. Patient Characteristics (by arm and overall)**

19  
20  
21  
22  
23  
24  
25  
26  
27  
28  
29  
30  
31  
32  
33  
34  
35  
36  
37  
38  
39  
40  
41  
42  
43  
44  
45  
46  
47  
48  
49  
50  
51  
52  
53  
54  
55  
56  
57  
58  
59  
60  
61  
62  
63  
64  
65

| Characteristic                    | Patients   | ...in Arm A | ...in Arm B |
|-----------------------------------|------------|-------------|-------------|
| Consented                         | 25 (100%)  | 11 (44%)    | 14 (56%)    |
| Randomized and treated            | 25 (100%)  | 11 (44%)    | 14 (56%)    |
| Evaluable for all study endpoints | 24 (96%)   | 10 (40%)    | 14 (56%)    |
| Sex:                              |            |             |             |
| Male                              | 12 (48%)   | 7 (58%)     | 5 (42%)     |
| Female                            | 13 (52%)   | 4 (31%)     | 9 (69%)     |
| Age, years                        |            |             |             |
| Median (range)                    | 8.0 (1-16) | 8 (2-16)    | 7.5 (1-16)  |
| Race:                             |            |             |             |
| White                             | 20 (80%)   | 8 (32%)     | 12 (48%)    |
| African-American                  | 1 (4%)     | 1 (4%)      | 0 (0%)      |
| Asian                             | 1 (4%)     | 0 (0%)      | 1 (4%)      |
| American Indian or Alaska native  | 1 (4%)     | 1 (4%)      | 0 (0%)      |
| Other                             | 2 (8%)     | 1 (4%)      | 1 (4%)      |
| Ethnicity, Hispanic               | 6 (24.0)   |             |             |
| Ethnicity, not Hispanic or Latino | 19 (76.0)  |             |             |
| Cytogenetic Risk Groups:          |            |             |             |
| Favorable                         | 4 (8%)     | 1 (4%)      | 3 (12%)     |
| Intermediate                      | 17 (68%)   | 6 (24%)     | 11 (44%)    |
| Unfavorable                       | 4 (16%)    | 4 (16%)     | 0 (0%)      |
| Cytogenetics:                     |            |             |             |
| Normal                            | 7 (28%)    | 3 (12%)     | 4 (16%)     |
| t(8;21)                           | 4 (16%)    | 1 (4%)      | 3 (12%)     |
| 11q23                             | 9 (36%)    | 5 (20%)     | 4 (16%)     |
| Other                             | 5 (20%)    | 2 (8%)      | 3 (12%)     |

|                                        |         |         |         |
|----------------------------------------|---------|---------|---------|
| Location:                              |         |         |         |
| Alberta (Canada)                       | 1 (4%)  | 1 (4%)  | 0 (0%)  |
| Children's Hospital Central California | 1 (4%)  | 0 (0%)  | 1 (4%)  |
| Denver                                 | 8 (32%) | 5 (20%) | 3 (12%) |
| Emory                                  | 1 (4%)  | 0 (0%)  | 1 (4%)  |
| Johns Hopkins                          | 5 (20%) | 5 (20%) | 0 (0%)  |
| John Hunter Hospital (Australia)       | 2 (8%)  | 0 (0%)  | 2 (8%)  |
| Mayo Clinic                            | 1 (4%)  | 1 (4%)  | 0 (0%)  |
| Nationwide Children's Hospital         | 1 (4%)  | 0 (0%)  | 1 (4%)  |
| Phoenix Children's Hospital            | 1 (4%)  | 0 (0%)  | 1 (4%)  |
| Primary Children's Hospital            | 1 (4%)  | 0 (0%)  | 1 (4%)  |
| Royal Children's Hospital (Australia)  | 3 (12%) | 1 (4%)  | 2 (8%)  |

301

### 302 **Toxicity**

303 Treatment-emergent AEs are summarized in **Table 2**. The most common grade 3  
 304 and grade 4 AEs were hematologic, including WBC decreased, anemia, platelet count  
 305 and neutrophil count decreased. Colitis (n=2), anorexia (n=3), hypophosphatemia (n=2),  
 306 and hypokalemia (n=3) were also noted. One patient in Arm A experienced colonic  
 307 perforation on Day 6 due to leukemic infiltration of the bowel wall that led to study  
 308 discontinuation. Two patients in Arm A died 6 months after completion of induction  
 309 therapy; one of necrotic bowel and *Pseudomonas* sepsis, and one of multisystem organ  
 310 failure. The latter patient died 5 months after study treatment as a complication of stem  
 311 cell transplantation. Neither death was attributed to decitabine nor to the chemotherapy  
 312 regimen received during study participation.

313

314 **Table 2. Grade 3 and Grade 4 treatment-emergent adverse events (TEAEs)**  
 315 **reported in treated patients fully assessable for all study endpoints, as assessed**  
 316 **by the Common Terminology Criteria for Adverse Events, version 4.0**

|               | Decitabine + Chemotherapy |                  | Chemotherapy only |                  |
|---------------|---------------------------|------------------|-------------------|------------------|
| Adverse event | Grade 3<br>n (%)          | Grade 4<br>n (%) | Grade 3<br>n (%)  | Grade 4<br>n (%) |

|                                             |          |          |          |          |
|---------------------------------------------|----------|----------|----------|----------|
| Any Grade 3 or Grade 4 TEAEs                | 7 (87.5) | 7 (87.5) | 7 (77.8) | 7 (77.8) |
| <b>Blood and lymphatic system disorders</b> |          |          |          |          |
| Anemia                                      | 6 (75.0) | 2 (25.0) | 4 (44.4) | 1 (11.1) |
| Febrile neutropenia                         | 1 (12.5) | 0        | 4 (44.4) | 0        |
| Other: Neutropenia                          | 1 (12.3) | 3 (37.5) | 1 (11.1) | 1 (11.1) |
| Other: Thrombocytopenia                     | 4 (50.0) | 4 (50.0) | 0        | 2 (22.2) |
| <b>Gastrointestinal disorders</b>           |          |          |          |          |
| Colitis                                     | 2 (25.0) | 0        | 2 (25.0) | 0        |
| <b>Investigations</b>                       |          |          |          |          |
| Neutrophil count decreased                  | 0        | 0        | 1 (11.1) | 3 (33.3) |
| Platelet count decreased                    | 0        | 1 (12.5) | 2 (22.2) | 3 (33.3) |
| White blood cell count decreased            | 6 (75.0) | 6 (75.0) | 3 (33.3) | 5 (55.6) |
| <b>Metabolism and nutrition disorders</b>   |          |          |          |          |
| Decreased appetite                          | 3 (37.5) | 0        | 0        | 0        |
| Hypokalemia                                 | 3 (37.5) | 0        | 1 (11.1) | 0        |
| Hypophosphatemia                            | 2 (25.0) | 0        | 0        | 0        |

317

### 318 **Pharmacokinetics**

319 Plasma concentrations of decitabine were quantifiable in all patients up to the  
 320 last time point of 180 minutes. Post-infusion, plasma concentrations declined in a bi-  
 321 exponential manner (**Figure 1**). Selected PK parameters of decitabine in subjects  
 322 overall are shown in **Table 3**. The overall mean (standard deviation) PK parameters for  
 323 the decitabine-treated patients were:  $C_{max}$ , 294(104) ng/mL;  $AUC_{0-\infty}$ , 214(72.4) ng·h/mL;  
 324 CL, 128(92.3) L/h;  $Vd_{ss}$ , 45.5(41.1) L;  $t_{1/2}$ , 0.453(0.0804) h;  $t_{max}$ , 0.831h(0.253). Estimated

1  
2  
3  
4 325 PK values for a 70-kg adult male receiving a 1 hour decitabine 20 mg/m<sup>2</sup> infusion are  
5  
6 326 shown for reference. The mean exposure to decitabine, as measured by C<sub>max</sub> and AUC  
7  
8 327 was similar in patients aged 12-16 years compared with those aged 2-11 years as  
9  
10 328 shown, and similar to those in adults. However, inter-patient variability in this study was  
11  
12  
13 329 high.

14  
15  
16 330

17  
18  
19 331 **Table 3. Mean Pharmacokinetic Parameters of Decitabine on Day 5 of**  
20 332 **Treatment—Overall and by Age Group, Pharmacokinetic**  
21 333 **Analysis Population**

| Pharmacokinetic Parameter    | Age Group (y)  |                | Arm A Total (N=11) | Comparator 70-kg Adult Male <sup>a</sup> |
|------------------------------|----------------|----------------|--------------------|------------------------------------------|
|                              | 2 - 11 (N=7)   | 12 - 16 (N=4)  |                    |                                          |
| C <sub>max</sub> (ng/mL)     | 286 (131)      | 307 (36.9)     | 294 (104)          | 107                                      |
| t <sub>max</sub> (h)         | 0.803 (0.272)  | 0.88 (0.243)   | 0.831 (0.253)      | NR                                       |
| t <sub>½</sub> (h)           | 0.458 (0.0777) | 0.446 (0.0967) | 0.453 (0.0804)     | 1.14                                     |
| AUC <sub>0-t</sub> (ng•h/mL) | 211 (90.0)     | 218 (35.1)     | 214 (72.4)         | NR                                       |
| AUC <sub>0-∞</sub> (ng•h/mL) | 212 (90.0)     | 219 (35.7)     | 215 (72.5)         | 580 <sup>b</sup>                         |
| CL (L/h)                     | 110 (113)      | 161 (23.9)     | 128 (92.3)         | 298                                      |
| Vd <sub>ss</sub> (L)         | 40.7 (52.0)    | 54.1 (9.67)    | 45.5 (41.1)        | 116                                      |

22  
23  
24  
25  
26  
27  
28  
29  
30  
31  
32  
33  
34  
35  
36  
37  
38  
39  
40  
41  
42  
43  
44  
45  
46  
47  
48  
49  
50  
51  
52  
53  
54  
55  
56  
57  
58  
59  
60  
61  
62  
63  
64  
65

AUC = area under the concentration-time curve; CL = total body clearance; C<sub>max</sub> = maximum concentration; NR = not reported; t<sub>½</sub> = half-life; t<sub>max</sub> = time to C<sub>max</sub>; Vd<sub>ss</sub> = volume of distribution at steady-state concentrations.

a: Data based on population pharmacokinetic analysis

b: cumulative AUC value over entire 5-day dosing period. Single-day AUC value = 116 ng•h/mL. All values presented as mean ± SD. standard deviation cannot be calculated where n=2

334

335 ***Anti-leukemic response***

336 Morphologic CRs and CRs with incomplete count recovery (CRi) rates were  
337 similar in both treatment arms: 100% CR/CRi in Arm A (decitabine) and 92% CR/CRi in  
338 Arm B (control). The patient who discontinued study participation on day 6 after  
339 receiving all decitabine doses and only one dose of cytarabine remained in a complete

1  
2  
3  
4 340 remission for two months without any further leukemia-directed treatment. She  
5  
6 341 eventually resumed standard therapy two months later and remains in CR 56+ months  
7  
8 342 later. MRD by multi-parameter flow cytometry showed that 85% of patients in Arm A  
9  
10 343 were MRD negative at day 30 of induction compared to 67% in Arm B. In a follow-up of  
11  
12 344 patients as of August 2015, 8 of 14 (57%) in Arm B and 5 of 10 (50%) of evaluable  
13  
14 345 patients in Arm A relapsed following additional treatment.  
15  
16

### 17 346 ***Biological marker analysis***

18  
19  
20 347 Quantitative DNA methylation analyses revealed global changes in methylation  
21  
22 348 following decitabine priming. Diagnostic and end-induction marrows were analyzed in 9  
23  
24 349 patients in each Arm (**Figure S1**). Paired differential methylation analysis of end-  
25  
26 350 induction marrows to patient matched screening marrows revealed 6990 differentially  
27  
28 351 methylated CpG loci (DML) encompassing 2518 genes in Arm A compared to only 1090  
29  
30 352 DML (539 genes) in Arm B (**Tables S1A-B**). Only DML in Arm A (n=4597) survived false  
31  
32 353 discovery p-value correction. Of all DML in Arm A, 4134 were hypomethylated and 2856  
33  
34 354 were hypermethylated. In Arm B, 785 DML were hypomethylated and 305 were  
35  
36 355 hypermethylated. There were 795 DML (438 genes) common to both arms. Although  
37  
38 356 about 80% of genes altered by DNA methylation in Arm B were common to Arm A, there  
39  
40 357 were significantly more probes altered for a given gene in Arm A. Moreover, 78% of  
41  
42 358 hypomethylated probes in Arm B were common with Arm A, compared with 56% of  
43  
44 359 hypermethylated probes common between treatment arms. The median delta-beta  
45  
46 360 values for Arms A and B were -0.27 and -0.28, respectively, indicating modest overall  
47  
48 361 hypomethylation induced by either treatment regimen at the specified delta-beta cut-off.  
49  
50 362 Forty-one percent of DML were hypermethylated after decitabine therapy compared with  
51  
52 363 28% after chemotherapy only. Regional and functional CpG distribution of DML after  
53  
54 364 therapy in both treatment arms was also examined. Functional distribution relates CpG  
55  
56 365 position to transcription start sites (TSS) -200 to -1500 bp, 5' untranslated region (UTR),  
57  
58  
59  
60  
61  
62  
63  
64  
65



1  
2  
3  
4  
5  
6  
7  
8  
9  
10  
11  
12  
13  
14  
15  
16  
17  
18  
19  
20  
21  
22  
23  
24  
25  
26  
27  
28  
29  
30  
31  
32  
33  
34  
35  
36  
37  
38  
39  
40  
41  
42  
43  
44  
45  
46  
47  
48  
49  
50  
51  
52  
53  
54  
55  
56  
57  
58  
59  
60  
61  
62  
63  
64  
65

366 and exon 1 for coding genes as well as gene bodies. In both treatment arms, gene body  
367 hypermethylation was the most frequent change, followed by gene body  
368 hypomethylation and TSS 200 hypomethylation (**Figure S2**). Regional distribution of  
369 DML was assessed based on proximity to the closest CpG island. In addition to CpG  
370 islands, shores are 0-2 kb from CpG islands, shelves are 2-4 kb away, and open sea  
371 regions are isolated loci without a designation. CpG island hypomethylation occurred in  
372 greater than 68% of DML in both groups. Hypermethylation occurred most prominently  
373 in open sea regions and to a greater degree in Arm A patients compared with those in  
374 Arm B receiving chemotherapy alone (**Figure S3**).

375 Unsupervised clustering analysis of DML for both treatment arms demonstrated  
376 strong separation of screening and end-induction marrows except for one sample pair in  
377 Arm A and three sample pairs in Arm B (**Figure 2**, top panels). In two of these cases,  
378 pre- and post-treatment samples co-clustered with its matching sample. One case in  
379 Arm A and Arm B clustered with diagnostic marrows, suggesting the marrow was  
380 possibly unaffected by therapy and indeed the sample in Arm A (1006\_1004) was from a  
381 patient with stable disease. Overall, these data indicate that decitabine therapy has a  
382 homogenizing effect on the recovering end-induction marrow in AML. This was evident  
383 when compared with Arm B samples, where DNA methylation was more heterogeneous  
384 after standard chemotherapy treatment.

385 To further assess the changes in recovering marrows in both arms, we  
386 performed an unsupervised clustering analysis of the top 0.1% most variable CpG  
387 probes (~430 probes) in the post-processed data. These data confirmed that the end-  
388 induction recovering marrows were distinctive from screening marrows and more  
389 homogenized in the decitabine-treated arm compared with those in the control arm  
390 (**Figure 2**, lower panels). To ensure that samples were not molecularly different at  
391 screening between the arms, we performed the above analyses comparing screening

1  
2  
3  
4 392 marrows in Arm A with Arm B and observed only 492 DML. Of these, 291 were common  
5  
6 393 to the Arm A DML list, while 3 DML were common to both Arm A and B comparisons and  
7  
8 394 0 DML were common to Arm B DML (**Figure 3**). These intrinsically different loci were  
9  
10 395 excluded from downstream gene-level analysis. Among the genes most prevalently  
11  
12 396 hypomethylated in Arm A were FOXC1, VSTM2A, WT1, ZNF135, ZIC1, and ZIC4,  
13  
14 397 (**Figure 4**), which may potentially be used to measure decitabine activity. In addition,  
15  
16 398 time-dependent promoter hypomethylation of these genes also occurred in peripheral  
17  
18 399 blood lymphocytes (**Figure 5**), confirming their significance as potential biomarkers of  
19  
20 400 decitabine response. Most notably, recovery of promoter methylation in peripheral blood  
21  
22 401 was seen in a patient with stable disease and whose recovering marrow co-clustered  
23  
24 402 with diagnostic marrow, hinting at signs of preliminary efficacy. The data point to the  
25  
26 403 potential utility of these genes as biomarkers of minimal residual disease in patients  
27  
28 404 treated with decitabine.

29  
30  
31  
32  
33 405 **Table 4** shows DNA methylation changes in several key biological pathways  
34  
35 406 potentially important to response to decitabine and chemotherapy. The top canonical  
36  
37 407 pathways in IPA for Arm A DML included gene alterations affecting mostly neuronal  
38  
39 408 signaling such as neuropathic pain signaling and glutamate receptor signaling (**Table 4**).  
40  
41 409 In Arm B, the top IPA canonical pathways included DML affecting embryonic stem cell  
42  
43 410 signaling and Rho GTPase signaling (**Table 4**).  
44  
45  
46  
47  
48  
49

50  
51  
52  
53  
54  
55  
56  
57  
58  
59  
60  
61  
62  
63  
64  
65  
412 **Table 4. Ingenuity Pathway Analysis of Differentially Methylated Genes.**

|                                                   | p-value  | Overlap n (%)  |
|---------------------------------------------------|----------|----------------|
| <b>Arm A Top Canonical Pathways</b>               |          |                |
| Neuropathic Pain Signaling in Dorsal Horn Neurons | 7.5e-12  | 35/100 (35.0%) |
| Glutamate Receptor Signaling                      | 2.45e-11 | 25/57 (43.9%)  |
| Amyotrophic Lateral Sclerosis Signaling           | 2.05e-09 | 31/98 (31.6%)  |
| Synaptic Long Term Potentiation                   | 1.00e-06 | 30/119 (25.2%) |
| Hepatic Fibrosis/Hepatic Stellate Cell Activation | 1.01e-06 | 40/183 (21.9%) |
|                                                   |          |                |

| <b>Arm B Top Canonical Pathways</b>                                             |          |              |
|---------------------------------------------------------------------------------|----------|--------------|
| Transcriptional Regulatory Network in Embryonic Stem Cells                      | 2.68e-04 | 4/40 (10.0%) |
| Thrombin Signaling                                                              | 7.94e-04 | 7/191 (3.7%) |
| GPCR-Mediated Integration of Enteroendocrine Signaling Exemplified by an L Cell | 2.36e-03 | 4/71 (5.6%)  |
| Signaling by Rho Family GTPases                                                 | 2.54e-03 | 7/234 (3.0%) |
| CXCR4 Signaling                                                                 | 7.03e-03 | 5/152 (3.3%) |

413 Differentially methylated genes for Arm A (decitabine + chemotherapy; n=2518) and Arm  
414 B (chemotherapy alone; n=539) were entered into the core pathway analysis option. Top  
415 5 canonical pathways are shown along with a significant p-value and the number of  
416 genes in each list belonging to the pathway.  
417

418 This study is unique in comparing the epigenetic and RNA expression  
419 consequences of induction chemotherapy following pre-treatment with decitabine vs  
420 chemotherapy alone in end-induction recovering bone marrow. This comparison  
421 revealed 104 differentially expressed genes in Arm A (**Table S2A**) and 74 genes in Arm  
422 B (**Table S2B**). There are 5 genes common to both treatment arms. Twelve genes that  
423 were differentially expressed in Arm A had DNA methylation changes affecting 72 DML  
424 (**Table S3A**). Among these were 57 probes impacting PCDGHGB2, the potential  
425 calcium-dependent cell-adhesion protein; the gene was hypomethylated but  
426 downregulated. In Arm B there were only 23 DML (**Table S3B**) corresponding to eight  
427 differentially expressed genes. Only *SIX3* overlapped between both arms at a single  
428 DML. Additionally, we saw no evidence of sustained repeat element reactivation in  
429 recovering week three marrows with or without decitabine pre-treatment (**Figure 6**).

## 431 DISCUSSION

432 This first-in-pediatric randomized trial of epigenetic priming in children with newly  
433 diagnosed AML demonstrated safety and tolerability and establishes the feasibility  
434 required to develop future trials for assessing durability of response. We did not assess  
435 durable responses in this study because its main purpose was to first assess safety and

1  
2  
3  
4  
5  
6  
7  
8  
9  
10  
11  
12  
13  
14  
15  
16  
17  
18  
19  
20  
21  
22  
23  
24  
25  
26  
27  
28  
29  
30  
31  
32  
33  
34  
35  
36  
37  
38  
39  
40  
41  
42  
43  
44  
45  
46  
47  
48  
49  
50  
51  
52  
53  
54  
55  
56  
57  
58  
59  
60  
61  
62  
63  
64  
65

436 tolerability of decitabine in children. The results trended towards non-inferiority of  
437 morphologic, immunophenotypic, and MRD response, although the small sample size  
438 limited statistical analyses. There was also evidence of decitabine-induced effects in  
439 end-induction bone marrow aspirates compared with those obtained at diagnosis.  
440 Children treated with decitabine as a single agent for five days prior to conventional  
441 cytotoxic therapy did not have rapid progression of their leukemic burden during the pre-  
442 phase, further supporting the feasibility and safety of this approach. Based on these  
443 results, a dose of 20 mg/m<sup>2</sup> daily for 5 days prior to standard conventional chemotherapy  
444 could be considered for testing for durable responses.

445 Most non-hematologic AEs reported in this study were mild to moderate in  
446 severity (grade 1 or 2), reversible, and easily managed. In general, the safety profile of  
447 decitabine in children with AML was consistent with that seen in adults. No previously  
448 unreported decitabine toxicities were observed. Drug-related hematologic toxicity,  
449 anorexia, and asymptomatic grade 3 hypokalemia and hypophosphatemia were slightly  
450 more common in decitabine treated patients.

451 This trial was not powered to detect a difference in response between the two  
452 arms and treatment with decitabine prior to standard induction therapy resulted in a  
453 similar morphological response compared to standard induction therapy. Of note, there  
454 were more high-risk cytogenetic patients in the decitabine arm (4 versus 0), which may  
455 indicate a benefit for decitabine priming prior to treatment in these patients. Patients in  
456 this study were generally representative of children with *de novo* childhood AML in age,  
457 gender, and biologic features, however there were slightly more patients with *WT1* and  
458 *CEBPA* mutations than previously reported. In addition, the impact on MRD suggests  
459 that decitabine may induce a higher percentage of MRD negative remissions; however,  
460 again the numbers in this study are too small to calculate statistics in a meaningful way.  
461 There was a non-significant trend toward a longer time to recover neutrophil and platelet

1  
2  
3  
4 462 counts in the decitabine-treated patients (data on file), and no AEs or SAEs were noted  
5  
6 463 as a result of delays in count recovery. These results suggest that exposure to  
7  
8 464 decitabine may have important implications for sensitizing potentially resistant leukemic  
9  
10 465 clones to cytotoxic chemotherapy, resulting in deeper remissions predictive of more  
11  
12 466 favorable outcomes. Larger randomized studies are needed to confirm these findings.

13  
14  
15 467 Alterations in DNA methylation and RNA expression patterns in end-induction  
16  
17 468 bone marrow between the two groups of patients suggest important consequences of  
18  
19 469 exposure to decitabine pretreatment on hematopoietic recovery after exposure to  
20  
21 470 intensive chemotherapy, where decitabine appears to have a homogenizing effect on  
22  
23 471 end-induction marrows that may ultimately be important in priming for chemotherapy  
24  
25 472 sensitization. Our data suggest that while chemotherapy alone may have an effect on  
26  
27 473 DNA methylation, the effect is clearly augmented by the addition of decitabine via  
28  
29 474 epigenetic changes that may impact both leukemic, normal hematopoietic progenitors,  
30  
31 475 as well as bone-marrow stromal cells. Furthermore, the data suggest that decitabine  
32  
33 476 therapy can be used to measure MRD/or patient response to therapy by assessing DNA  
34  
35 477 methylation status of specific promoter regions non-invasively in blood. The pathway  
36  
37 478 analysis conducted to compare differentially methylated loci in the decitabine treated  
38  
39 479 arm to the chemotherapy only arm revealed a number of pathways implicated to  
40  
41 480 neuronal signaling but the results were quite distinct from the ADE only arm. While the  
42  
43 481 implications of neuronal signaling are not currently clear, we postulate it must be related  
44  
45 482 to the bone marrow niche post-treatment since no dorsal root ganglia or other neuronal  
46  
47 483 tissue exist in the marrow. Presumably this could be due to ion channel currents that  
48  
49 484 play an important role in bone-marrow derived mesenchymal stem cells and  
50  
51 485 hematopoietic progenitors (26). Our observations further suggest that monitoring  
52  
53 486 changes in normal progenitors may be important in understanding the short and longer-

1  
2  
3  
4 487 term consequences of exposure to methyltransferase inhibitors on malignant and normal  
5  
6 488 bone marrow progenitors.

7  
8 489 An increased percentage of DMLs were hypermethylated in patients receiving  
9  
10 490 decitabine compared to those receiving chemotherapy alone, suggesting that decitabine  
11  
12 491 has an effect on the methylome of the recovering marrow beyond DNA demethylation.  
13  
14  
15 492 This appears to result in changes that differ both qualitatively and quantitatively from  
16  
17 493 chemotherapy alone. Importantly, chemotherapy molecularly alters the recovering  
18  
19 494 marrow epigenome, but the number of changes is significantly fewer than with  
20  
21  
22 495 decitabine and the pathways affected differ significantly.

23  
24 496

## 25 26 497 **CONCLUSIONS**

27  
28  
29 498 The toxicity and PK results observed in the patients in this study suggest that decitabine  
30  
31 499 can be safely combined with standard doses and schedules of anticancer agents in  
32  
33 500 children with newly diagnosed AML. Furthermore, our data suggest that this regimen  
34  
35 501 alters DNA methylation and RNA expression compared to ADE chemotherapy alone,  
36  
37 502 and patients treated with decitabine could have minimal residual disease measured by  
38  
39 503 assessing DNA methylation status of specific promoter regions. Preclinical studies have  
40  
41 504 shown additive or synergistic activity when decitabine is combined with a variety of other  
42  
43 505 anticancer therapies (27-30) and results from trials such as this provide further evidence  
44  
45 506 of feasibility, safety and possible strategies for larger randomized trials in patients with  
46  
47 507 newly diagnosed or recurrent/refractory leukemia as well as in the minimal disease state  
48  
49 508 during post-remission follow-up. No excess or unexpected toxicities were seen. The  
50  
51 509 most common drug-related grade 3 or grade 4 AEs were hematologic and PK/PD were  
52  
53 510 as expected. Complete remission rates were similar. Patients treated with decitabine  
54  
55 511 prior to conventional chemotherapy had distinct changes in DNA methylation and  
56  
57  
58  
59  
60  
61  
62  
63  
64  
65

1  
2  
3  
4 512 transcriptional regulation. Repeat element transcription may be of interest for further  
5  
6 513 mechanistic study. In conclusion, epigenetic therapy with decitabine is safe for use in  
7  
8 514 children and the clinical findings together with molecular correlative studies suggest that  
9  
10 515 there may be early signs of enhanced efficacy. However, further studies are needed to  
11  
12 516 definitively determine the long-term patient outcomes of decitabine priming in children  
13  
14  
15 517 with AML.  
16  
17  
18 518

19  
20  
21 519 **LIST OF ABBREVIATIONS:**  
22

23 520 ADE = cytarabine/daunorubicin/etoposide chemotherapy regimen  
24  
25 521 AML = acute myelogenous leukemia  
26  
27 522 AUC = area under the curve  
28  
29 523 BSA = body surface area  
30  
31 524 C max = maximum plasma concentration  
32  
33 525 CML = chronic myelogenous leukemia  
34  
35 526 CNS = central nervous system  
36  
37 527 CR = complete remission  
38  
39 528 CR = complete remission with incomplete count recovery  
40  
41 529 DADE = decitabine plus daunorubicin/cytarabine/etoposide chemotherapy regimen  
42  
43 530 DML = differentially methylated loci  
44  
45 531 DNA = deoxyribonucleic acid  
46  
47 532 FAB = French-American-British classification  
48  
49 533 HIV = human immunodeficiency virus  
50  
51 534 LFS = leukemia-free survival  
52  
53 535 MRD = minimal residual disease  
54  
55 536 OS = overall survival  
56  
57  
58  
59  
60  
61  
62  
63  
64  
65

1  
2  
3  
4 537 PD = pharmacodynamics  
5  
6 538 PK = pharmacokinetics  
7  
8 539 RNA = ribonucleic acid  
9  
10 540 Tmax = time to maximum plasma concentration  
11  
12  
13 541

## 15 542 **DECLARATIONS**

### 18 543 **Ethics Approval and Consent to Participate:**

19  
20 544 The study protocol was approved by each institutional review boards at every  
21  
22 545 participating site and was conducted in accordance with the Declaration of Helsinki,  
23  
24 546 Good Clinical Practice, and all local and federal regulatory guidelines. A parent or legal  
25  
26 547 guardian provided written informed consent, with patient assent as appropriate  
27  
28 548 according to institutional requirements.  
29  
30

31 549  
32  
33 550 **Consent for Publication:** Not applicable  
34

### 36 551 **Availability of Data and Materials:**

37  
38 552 The datasets generated and analyzed in this study are included in this article and are  
39  
40 553 available from the corresponding author on reasonable request. In addition, the DNA  
41  
42 554 methylation and RNA-seq data discussed in this publication have been deposited in  
43  
44 555 NCBI's Gene Expression Omnibus, and are accessible through the GEO series  
45  
46 556 accession number GSE78963.  
47  
48

49 557

### 51 558 **Competing Interests:**

52  
53 559 Mark Jones and Peter Tarassoff are former employees of Eisai Pharmaceuticals. Robert  
54  
55 560 Arceci was a consultant for Pfizer. Partial support from Eisai was obtained for  
56  
57  
58  
59  
60  
61  
62  
63  
64  
65



1  
2  
3  
4 561 correlative laboratory studies (R.J.A., S.M.). There are no other potential conflicts of  
5  
6 562 interest to declare.  
7

8  
9 563

10 564 **Funding and Support:**

11  
12  
13 565 This work was partially supported by Eisai Pharmaceuticals, Inc. In addition, the studies  
14  
15 566 were partially supported by the Ron Matricaria Institute of Molecular Medicine at Phoenix  
16  
17 567 Children's Hospital (R.J.A.), the University of Arizona (R.J.A.), and TGen, Inc (R.J.A.,  
18  
19 568 B.S.). During part of the study period, R.J.A. was supported by the King Fahd Chair in  
20  
21 569 Pediatric Oncology at Johns Hopkins University. Additional support was from The  
22  
23 570 McCormick Tribune Foundation (L.G.), Alex's Lemonade Stand (L.G.), the Morgan  
24  
25 571 Adams Foundation (L.G. and M.E.M.), the St. Baldrick's Foundation (R.J.A.), The Lund  
26  
27 572 Foundation (R.J.A.), and the Najafi Fund (R.J.A.). M.E.M. was partially supported by the  
28  
29 573 National Institutes of Health K12 CA086913-08. J.E.F. is partially supported by the  
30  
31 574 Arkansas Biosciences Institute. L.G. is partially supported by the Clark Family and Ergen  
32  
33 575 Chairs in Pediatric Cancer Therapeutics at Children's Hospital Colorado.  
34  
35  
36  
37

38 576

39  
40 577 **Authorship Contributions:**

41  
42 578 L.G. and R.J.A. designed and wrote the study concept and scientific hypotheses, derived  
43  
44 579 the full protocol, provided study oversight during the conduct of the study, enrolled  
45  
46 580 patients on the study, reviewed data and toxicity of patients, and interpreted the data.  
47  
48 581 R.J.A. performed many of the scientific experiments and contributed to a draft of the  
49  
50 582 manuscript. L.G. performed the literature search, wrote the first, all drafts and the final  
51  
52 583 manuscript, helped prepare and reviewed the Figures and Tables, and collated and  
53  
54 584 incorporated comments from all co-authors. B.S. conducted experiments and provided  
55  
56 585 oversight of the scientific experiments not completed by R.J.A., prepared and reviewed  
57  
58 586 the Figures and Tables, and contributed substantially to the data analysis and writing  
59  
60  
61  
62  
63  
64  
65

1  
2  
3  
4 587 and editing of the manuscript. T.T. helped analyze and review the experiments and  
5  
6 588 Figures and Tables, and assisted substantially in the writing and reviewing of the final  
7  
8 589 manuscript. J.E.F., D.W., C.L., G.C.G., W.S.L., J.C., D.L., and S.M. contributed to the  
9  
10 590 scientific experiments and data analyses including Figure preparation and review. J.E.F.  
11  
12 591 and T.T. also contributed to writing the Methods sections, reviewing, and editing the  
13  
14 592 manuscript. S.M. contributed to the data analysis and commentary. F.A., M.E.M., C.A.,  
15  
16 593 P.B., T.C., L.M., A.N., J.P., J. B. enrolled patients on the clinical trial and reviewed and  
17  
18 594 commented on the manuscript prior to submission. M.J., L.C., S.S., and P.T. reviewed  
19  
20 595 the study and manuscript. M.J. representing the Eisai Inc., provided study enrollment  
21  
22 596 materials, oversight and analysis within the context of the protocol operations and data  
23  
24 597 analysis. Eisai, Inc., is the manufacturer of decitabine and the company providing partial  
25  
26 598 support for the conduct of this trial.  
27  
28  
29  
30

31 599

32  
33 600 **Acknowledgements:**

34  
35 601 Dr. Francoise Mechinaud (Royal Children’s Hospital, Australia) and Dr. Wendy Tcheng  
36  
37 602 (Children’s Hospital of Central California) also treated patients on this trial. Dr. Peter  
38  
39 603 Tarrasoff had oversight and analysis of the protocol operations on behalf of Eisai, Inc.,  
40  
41 604 the manufacturer of decitabine and the company providing partial support for the  
42  
43 605 conduct of this trial.  
44  
45  
46

47 606

48  
49 607 Lori Cuyugan and Shobana Sekar (Translational Genomics Research Institute, Phoenix,  
50  
51 608 AZ) for the generation and analysis of RNA-seq data.  
52

53 609

54  
55 610 **Dedication:**

56  
57  
58 611 The authors of this paper would like to recognize the fundamental contributions that Dr.  
59  
60 612 Robert Arceci made not only in the conception, design, and conduct of this study and the  
61  
62

1  
2  
3  
4 613 associated biology work incorporated within, but to the field of pediatric oncology as a  
5  
6 614 whole. During the laboratory correlate analysis and preparation of this manuscript, Dr.  
7  
8 615 Arceci's life was tragically cut short in a fatal traffic accident. His collaborators on this  
9  
10 616 study wish to acknowledge his myriad contributions to this work and the field, and  
11  
12 617 remain dedicated to pursuing the highest degree of scientific collaboration and integrity  
13  
14 618 in his honor.  
15  
16  
17  
18  
19

619

## 620 REFERENCES

- 21  
22  
23 621 1. Buckley JD, Lampkin BC, Nesbit ME, Bernstein ID, Feig SA, Kersey JH, et al.  
24 622 Remission induction in children with acute non-lymphocytic leukemia using cytosine  
25 623 arabinoside and doxorubicin or daunorubicin: a report from the Childrens Cancer Study  
26 624 Group. *Med Pediatr Oncol.* 1989;17(5):382-90.  
27 625 2. Hurwitz CA, Mounce KG, Grier HE. Treatment of patients with acute  
28 626 myelogenous leukemia: review of clinical trials of the past decade. *J Pediatr Hematol*  
29 627 *Oncol.* 1995;17(3):185-97.  
30 628 3. Wells RJ, Woods WG, Lampkin BC, Nesbit ME, Lee JW, Buckley JD, et al.  
31 629 Impact of high-dose cytarabine and asparaginase intensification on childhood acute  
32 630 myeloid leukemia: a report from the Childrens Cancer Group. *J Clin Oncol.*  
33 631 1993;11(3):538-45.  
34 632 4. Huether R, Dong L, Chen X, Wu G, Parker M, Wei L, et al. The landscape of  
35 633 somatic mutations in epigenetic regulators across 1,000 paediatric cancer genomes. *Nat*  
36 634 *Commun.* 2014;5:3630.  
37 635 5. Ochs MF, Farrar JE, Considine M, Wei Y, Meshinchi S, Arceci RJ. Outlier  
38 636 Analysis and Top Scoring Pair for Integrated Data Analysis and Biomarker Discovery.  
39 637 *IEEE/ACM Trans Comput Biol Bioinform.* 2014;11(3):520-32.  
40 638 6. Tsai HC, Li H, Van Neste L, Cai Y, Robert C, Rassool FV, et al. Transient low  
41 639 doses of DNA-demethylating agents exert durable antitumor effects on hematological and  
42 640 epithelial tumor cells. *Cancer Cell.* 2012;21(3):430-46.  
43 641 7. Anzai H, Frost P, Abbruzzese JL. Synergistic cytotoxicity with 2'-deoxy-5-  
44 642 azacytidine and topotecan in vitro and in vivo. *Cancer Res.* 1992;52(8):2180-5.  
45 643 8. Arnold CN, Goel A, Boland CR. Role of hMLH1 promoter hypermethylation in  
46 644 drug resistance to 5-fluorouracil in colorectal cancer cell lines. *Int J Cancer.*  
47 645 2003;106(1):66-73.  
48 646 9. Avramis VI, Mecum RA, Nyce J, Steele DA, Holcenberg JS. Pharmacodynamic  
49 647 and DNA methylation studies of high-dose 1-beta-D-arabinofuranosyl cytosine before  
50 648 and after in vivo 5-azacytidine treatment in pediatric patients with refractory acute  
51 649 lymphocytic leukemia. *Cancer Chemother Pharmacol.* 1989;24(4):203-10.  
52  
53  
54  
55  
56  
57  
58  
59  
60  
61  
62  
63  
64  
65

1  
2  
3  
4  
5  
6  
7  
8  
9  
10  
11  
12  
13  
14  
15  
16  
17  
18  
19  
20  
21  
22  
23  
24  
25  
26  
27  
28  
29  
30  
31  
32  
33  
34  
35  
36  
37  
38  
39  
40  
41  
42  
43  
44  
45  
46  
47  
48  
49  
50  
51  
52  
53  
54  
55  
56  
57  
58  
59  
60  
61  
62  
63  
64  
65

650 10. Eramo A, Pallini R, Lotti F, Sette G, Patti M, Bartucci M, et al. Inhibition of  
651 DNA methylation sensitizes glioblastoma for tumor necrosis factor-related apoptosis-  
652 inducing ligand-mediated destruction. *Cancer Res.* 2005;65(24):11469-77.

653 11. Fulda S, Kufer MU, Meyer E, van Valen F, Dockhorn-Dworniczak B, Debatin  
654 KM. Sensitization for death receptor- or drug-induced apoptosis by re-expression of  
655 caspase-8 through demethylation or gene transfer. *Oncogene.* 2001;20(41):5865-77.

656 12. Kanda T, Tada M, Imazeki F, Yokosuka O, Nagao K, Saisho H. 5-aza-2'-  
657 deoxycytidine sensitizes hepatoma and pancreatic cancer cell lines. *Oncol Rep.*  
658 2005;14(4):975-9.

659 13. Niitsu N, Hayashi Y, Sugita K, Honma Y. Sensitization by 5-aza-2'-deoxycytidine  
660 of leukaemia cells with MLL abnormalities to induction of differentiation by all-trans  
661 retinoic acid and 1alpha,25-dihydroxyvitamin D3. *Br J Haematol.* 2001;112(2):315-26.

662 14. Plumb JA, Strathdee G, Sludden J, Kaye SB, Brown R. Reversal of drug  
663 resistance in human tumor xenografts by 2'-deoxy-5-azacytidine-induced demethylation  
664 of the hMLH1 gene promoter. *Cancer Res.* 2000;60(21):6039-44.

665 15. Qiu YY, Mirkin BL, Dwivedi RS. Inhibition of DNA methyltransferase reverses  
666 cisplatin induced drug resistance in murine neuroblastoma cells. *Cancer Detect Prev.*  
667 2005;29(5):456-63.

668 16. Qin T, Youssef EM, Jelinek J, Chen R, Yang AS, Garcia-Manero G, et al. Effect  
669 of cytarabine and decitabine in combination in human leukemic cell lines. *Clin Cancer*  
670 *Res.* 2007;13(14):4225-32.

671 17. Phillips CL, Davies SM, McMasters R, Absalon M, O'Brien M, Mo J, et al. Low  
672 dose decitabine in very high risk relapsed or refractory acute myeloid leukaemia in  
673 children and young adults. *Br J Haematol.* 2013;161(3):406-10.

674 18. Kantarjian H, Oki Y, Garcia-Manero G, Huang X, O'Brien S, Cortes J, et al.  
675 Results of a randomized study of 3 schedules of low-dose decitabine in higher-risk  
676 myelodysplastic syndrome and chronic myelomonocytic leukemia. *Blood.*  
677 2007;109(1):52-7.

678 19. Yang AS, Doshi KD, Choi SW, Mason JB, Mannari RK, Gharybian V, et al.  
679 DNA methylation changes after 5-aza-2'-deoxycytidine therapy in patients with  
680 leukemia. *Cancer Res.* 2006;66(10):5495-503.

681 20. Cheson BD, Bennett JM, Kopecky KJ, Buchner T, Willman CL, Estey EH, et al.  
682 Revised recommendations of the International Working Group for Diagnosis,  
683 Standardization of Response Criteria, Treatment Outcomes, and Reporting Standards for  
684 Therapeutic Trials in Acute Myeloid Leukemia. *J Clin Oncol.* 2003;21(24):4642-9.

685 21. Legendre CR, Demeure MJ, Whitsett TG, Gooden GC, Bussey KJ, Jung S, et al.  
686 Pathway Implications of Aberrant Global Methylation in Adrenocortical Cancer. *PLoS*  
687 *One.* 2016;11(3):e0150629.

688 22. Wang D, Yan L, Hu Q, Sucheston LE, Higgins MJ, Ambrosone CB, et al. IMA:  
689 an R package for high-throughput analysis of Illumina's 450K Infinium methylation data.  
690 *Bioinformatics.* 2012;28(5):729-30.

691 23. Jurka J, Kapitonov VV, Pavlicek A, Klonowski P, Kohany O, Walichiewicz J.  
692 Repbase Update, a database of eukaryotic repetitive elements. *Cytogenet Genome Res.*  
693 2005;110(1-4):462-7.

- 1  
2  
3  
4 694 24. Triche T CA. artemis: Stable version used in EISAI repeat analyses.  
5 695 <http://zenodo.org/record/33157/export/hm> - .V0e1RMvmpiwAccessed November 3,  
6 696 2015.  
7  
8 697 25. Triche T CA. TxDbLite: Stable version used in EISAI repeat analyses. .  
9 698 <http://zenodo.org/record/33170/export/hm> - .V0e17cvmpiwAccessed November 3, 2015.  
10 699 26. Li GR, Deng XL. Functional ion channels in stem cells. World J Stem Cells.  
11 700 2011;3(3):19-24.  
12 701 27. Kuendgen A, Lubbert M. Current status of epigenetic treatment in  
13 702 myelodysplastic syndromes. Ann Hematol. 2008;87(8):601-11.  
14 703 28. Kumagai T, Wakimoto N, Yin D, Gery S, Kawamata N, Takai N, et al. Histone  
15 704 deacetylase inhibitor, suberoylanilide hydroxamic acid (Vorinostat, SAHA) profoundly  
16 705 inhibits the growth of human pancreatic cancer cells. Int J Cancer. 2007;121(3):656-65.  
17 706 29. Leshchenko VV, Kuo PY, Shaknovich R, Yang DT, Gellen T, Petrich A, et al.  
18 707 Genomewide DNA methylation analysis reveals novel targets for drug development in  
19 708 mantle cell lymphoma. Blood. 2010;116(7):1025-34.  
20 709 30. Yang H, Hoshino K, Sanchez-Gonzalez B, Kantarjian H, Garcia-Manero G.  
21 710 Antileukemia activity of the combination of 5-aza-2'-deoxycytidine with valproic acid.  
22 711 Leuk Res. 2005;29(7):739-48.  
23 712

## 713 **FIGURE LEGENDS**

714

715 **Figure 1.** Mean decitabine blood concentration-time profile measured in whole  
716 blood by age group.

717

718 **Figure 2.** Hierarchical clustering of differentially methylated loci (DML) in Arm A  
719 (decitabine + chemotherapy) and Arm B (chemotherapy alone). Top Panel:  
720 unsupervised clustering analysis of 6990 DML in Arm A and 1090 DML in Arm B  
721 revealed separation of end of induction recovering marrows at week 3 from  
722 screening marrows (X0BM). Lower Panel: Unsupervised hierarchical clustering of  
723 the top 0.1% most variable loci (SD) also separated screening marrows (X0BM)  
724 from end of induction recovery marrows at week 3. In both analyses, Arm A  
725 shows better separation of the two time points than in Arm B, indicating that

1  
2  
3  
4 726 decitabine therapy appears to homogenize marrows to a larger degree than in  
5  
6 727 chemotherapy alone.

7  
8  
9 728

10  
11 729 **Figure 3.** Overlap of differentially methylated loci between arms and time points

12  
13  
14 730 in Arm A (DADE), Arm B (ADE), and screening vs. recovery marrow aspirates.

15  
16 731 Screening marrows for samples in Arm A and Arm B are also compared and

17  
18 732 demonstrate little intrinsic bias between groups.

19  
20  
21 733

22  
23 734 **Figure 4.** Integrated Genomic Viewer snapshot of differentially methylated genes

24  
25 735 affected by hypomethylation in response to decitabine therapy. Vertical heatmaps

26  
27 736 represent significantly differentially methylated ( $p$  value  $<0.05$ ) probes in the 6 genes

28  
29 737 illustrated. Each row on the heatmap represent a unique sample. Many more probes

30  
31 738 were differentially methylated in Arm A (decitabine + chemotherapy) compared with Arm

32  
33 739 B (chemotherapy alone) for the probes shown. Hypomethylation (green) in response to

34  
35 740 decitabine (Arm A) is evident in end of induction recovery marrows (wk 3) compared with

36  
37 741 diagnostic marrows (screen). Array avg  $\beta$  values are represented in the heatmap. Scale

38  
39 742 ranges from 0-1, where 0 is unmethylated (green) and 1 is fully methylated (red). Tracks

40  
41 743 shown: gene, CpG 450K probe, and CpG island.

42  
43  
44 744

45  
46  
47  
48 745 **Figure 5.** Time-course collection of peripheral blood samples in Arm A reveal

49  
50 746 consistent decreases in promoter methylation at relevant transcription start sites

51  
52 747 over treatment in all responders, as well as a reversal of this decrease in the sole

53  
54  
55 748 non-responsive patient (1006-1004). A distinct uptick in the patient's promoter

1  
2  
3  
4 749 methylation from day 14 to 21 is noted, which corresponded clinically to the  
5  
6 750 patient's disease progression.  
7

8  
9 751  
10  
11 752 **Figure 6.** Unsupervised hierarchical clustering of repeat element expression in  
12  
13 753 screening and week 3 bone marrows, with (Arm A) or without (Arm B) decitabine  
14  
15 754 priming, in transcripts per million (TPM). No clear separation by trial arm is  
16  
17 755 visible, and a maximum of 4 transcripts per million is observed, suggesting that  
18  
19 756 mobilization of repeats by demethylating agents does not persist beyond the  
20  
21 757 course of treatment and is not significantly different between the treatment arms.  
22  
23  
24  
25  
26 758

## 27 28 759 **SUPPLEMENTARY FIGURE LEGENDS**

29  
30 760  
31  
32  
33 761 **Figure S1.** Schema of sample analysis workflow.  
34

35 762  
36  
37  
38 763 **Figure S2.** Distribution of differentially methylated loci (DML) according to functional  
39  
40 764 CpG contextual distribution in Arms A (decitabine + chemotherapy) and B  
41  
42 765 (chemotherapy alone). Pie charts demonstrate the frequency by which hyper or  
43  
44 766 hypomethylated loci are distributed according to their functional position.  
45  
46  
47 767

48  
49 768 **Figure S3.** Distribution of differentially methylated loci (DML) according to CpG Island  
50  
51 769 contextual distribution in Arms A (decitabine + chemotherapy) and B (chemotherapy  
52  
53 770 alone). Pie charts demonstrate the frequency by which hyper or hypomethylated loci are  
54  
55 771 distributed according to their proximity of CpG islands.  
56  
57  
58 772

Figure 1.

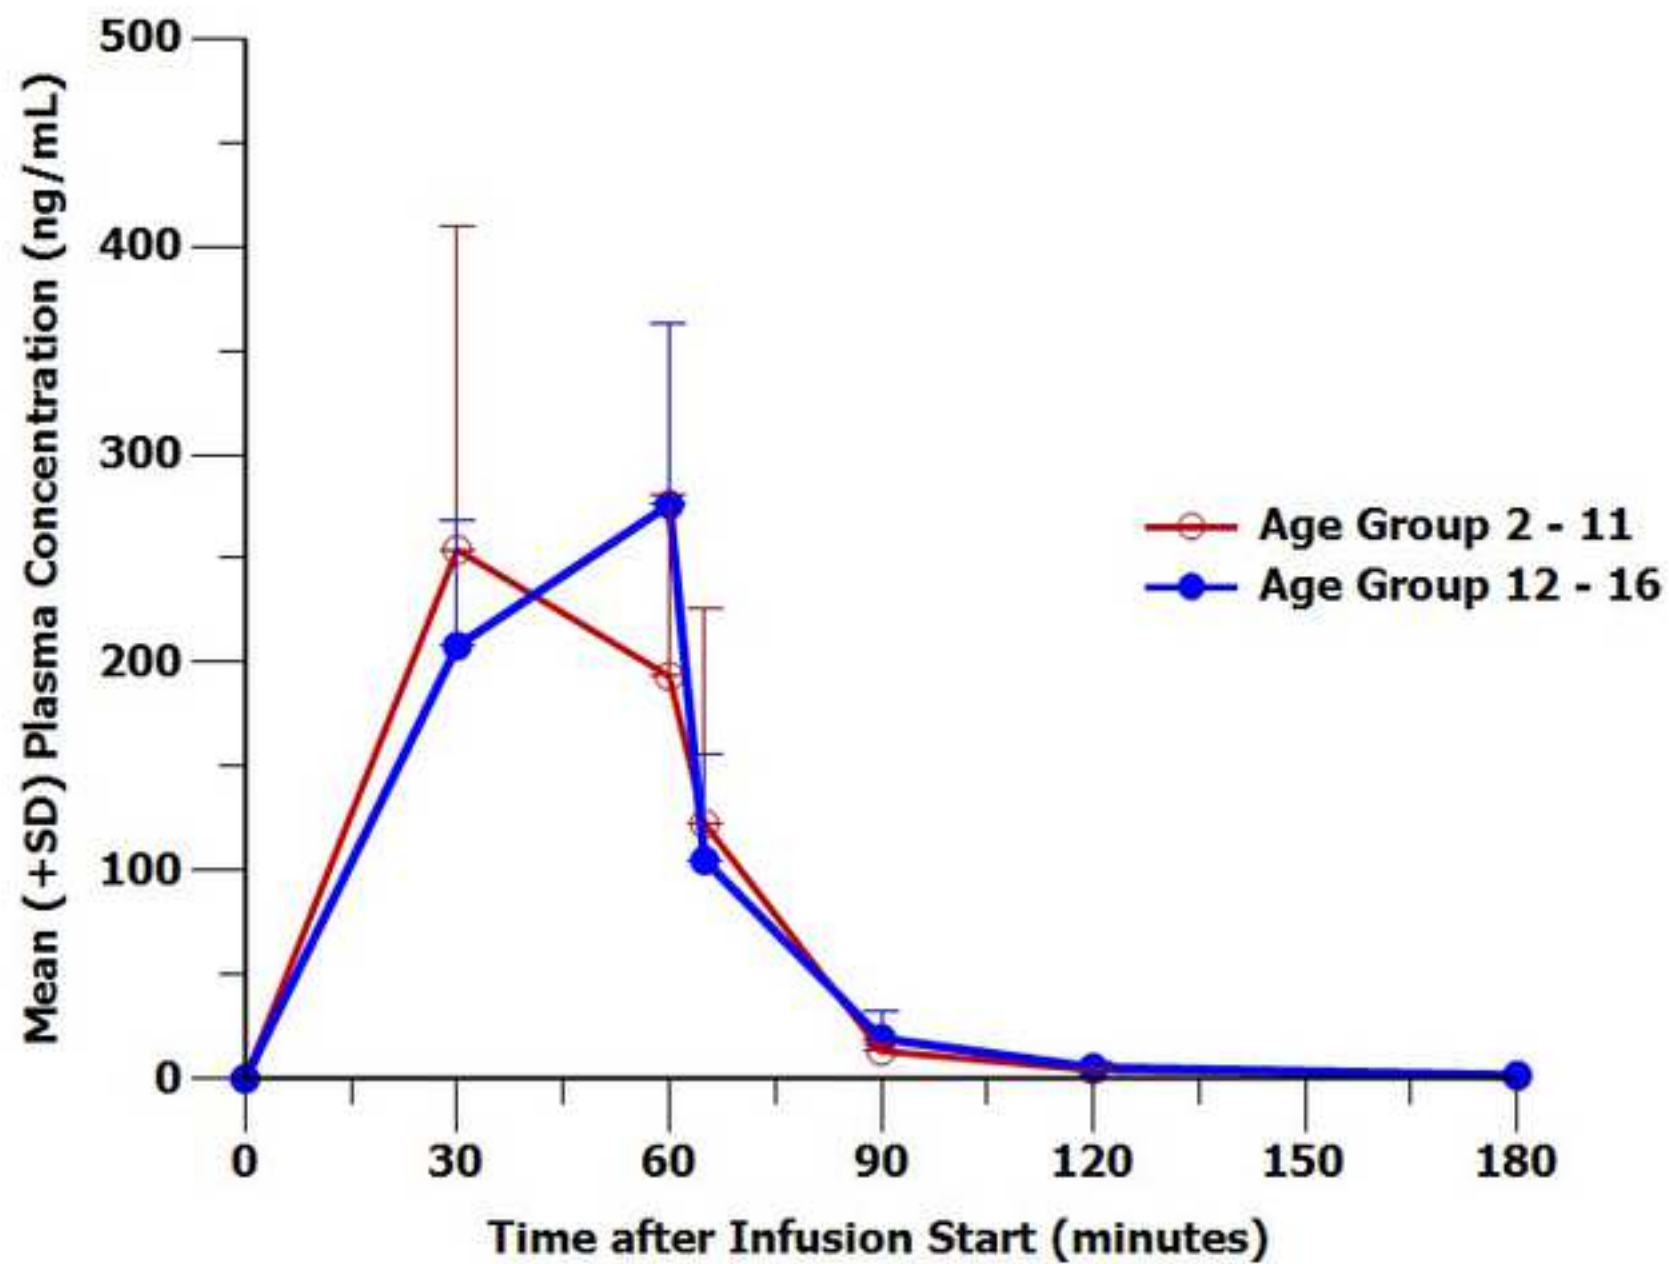



Figure 2.

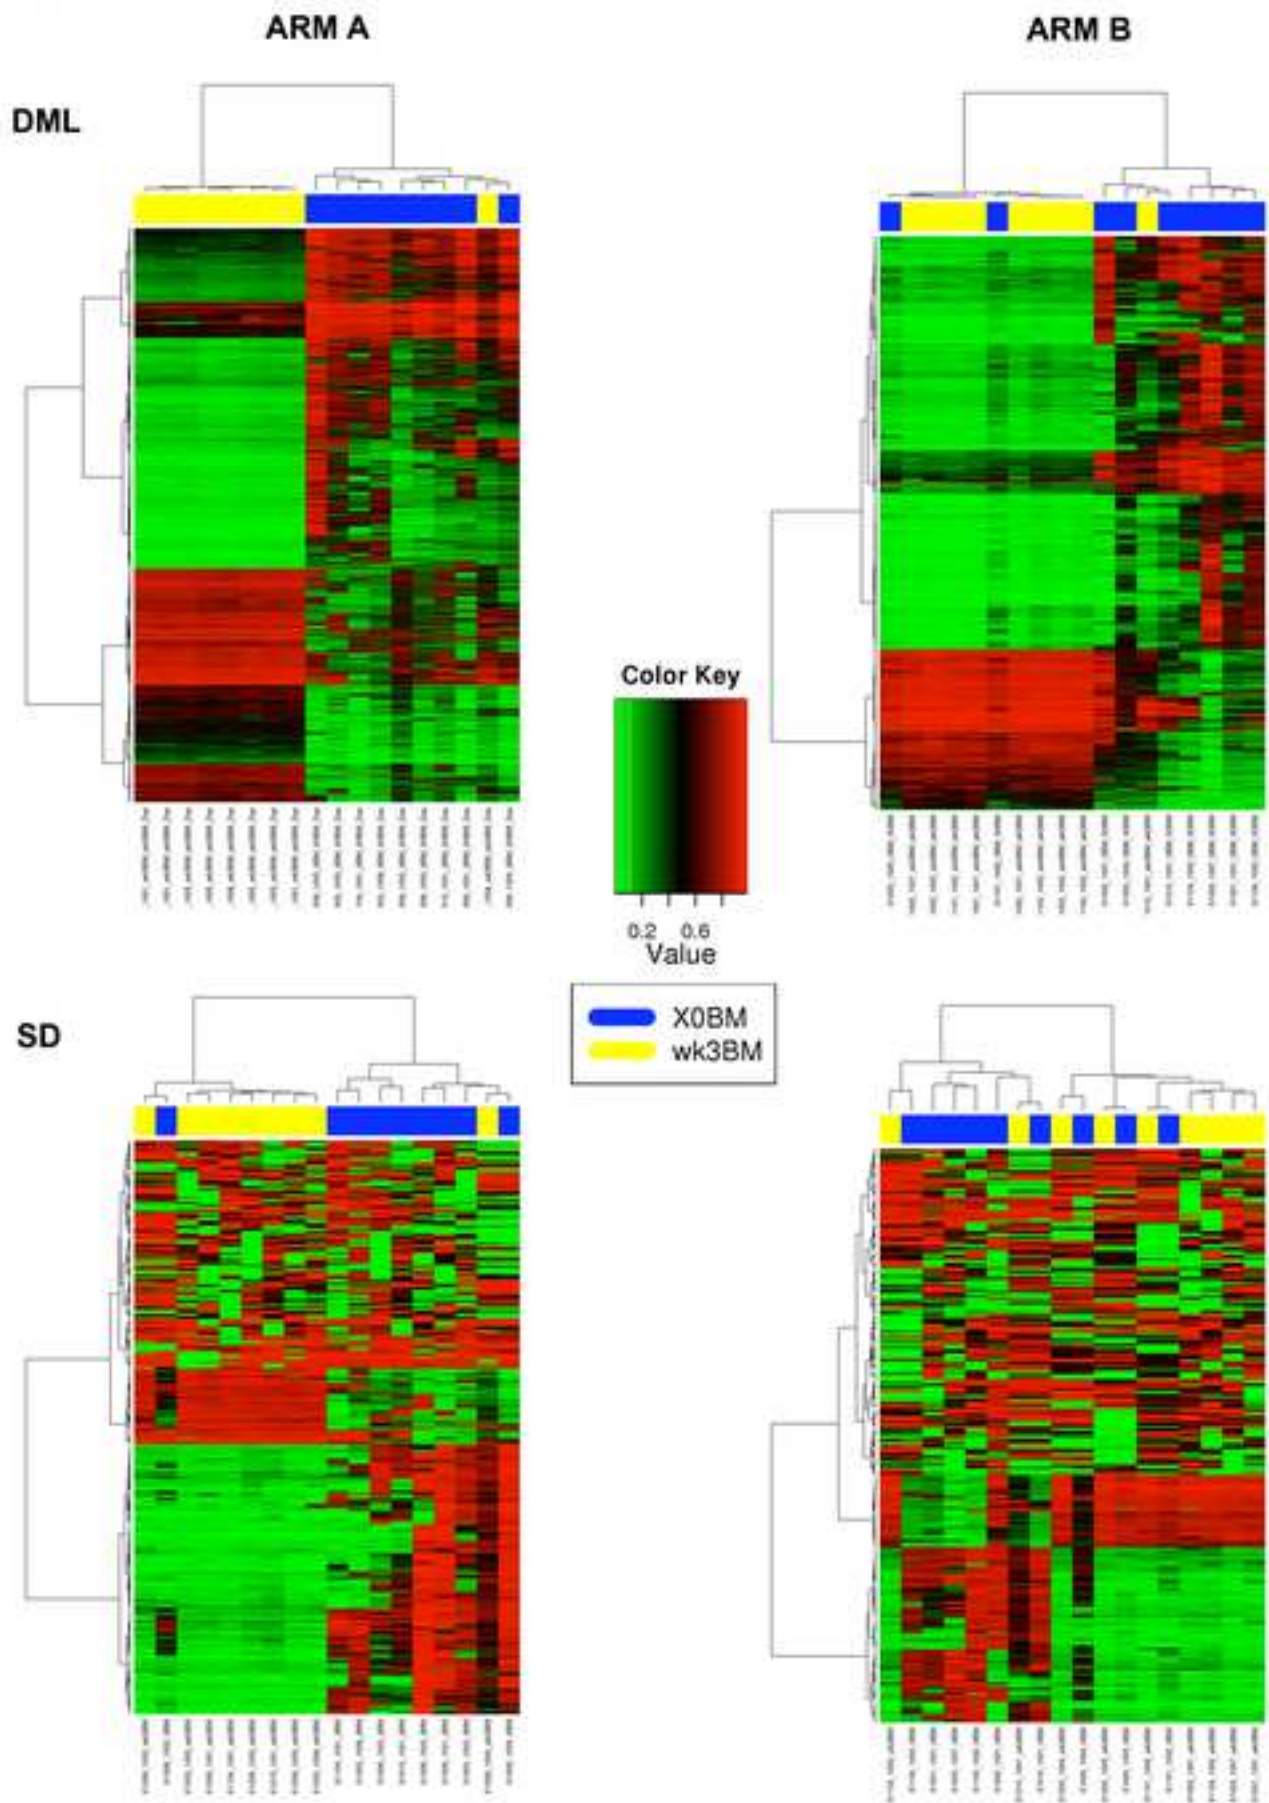

### Figure 3.

Arm A screening marrow vs  
Arm B screening marrow

Arm A screening marrow vs.  
3 week recovery marrow

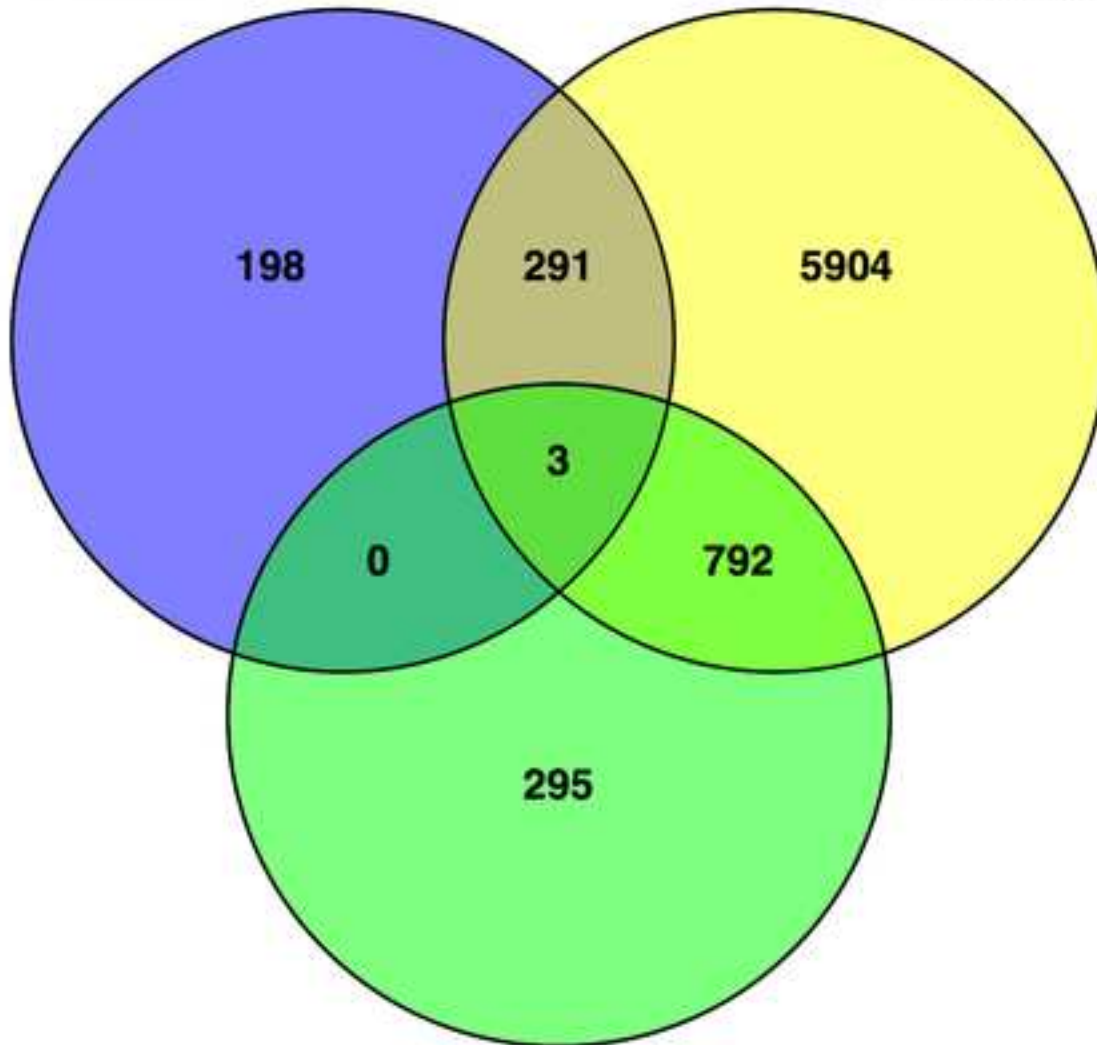

Arm B screening marrow vs.  
3 week recovery marrow

## Figure 4

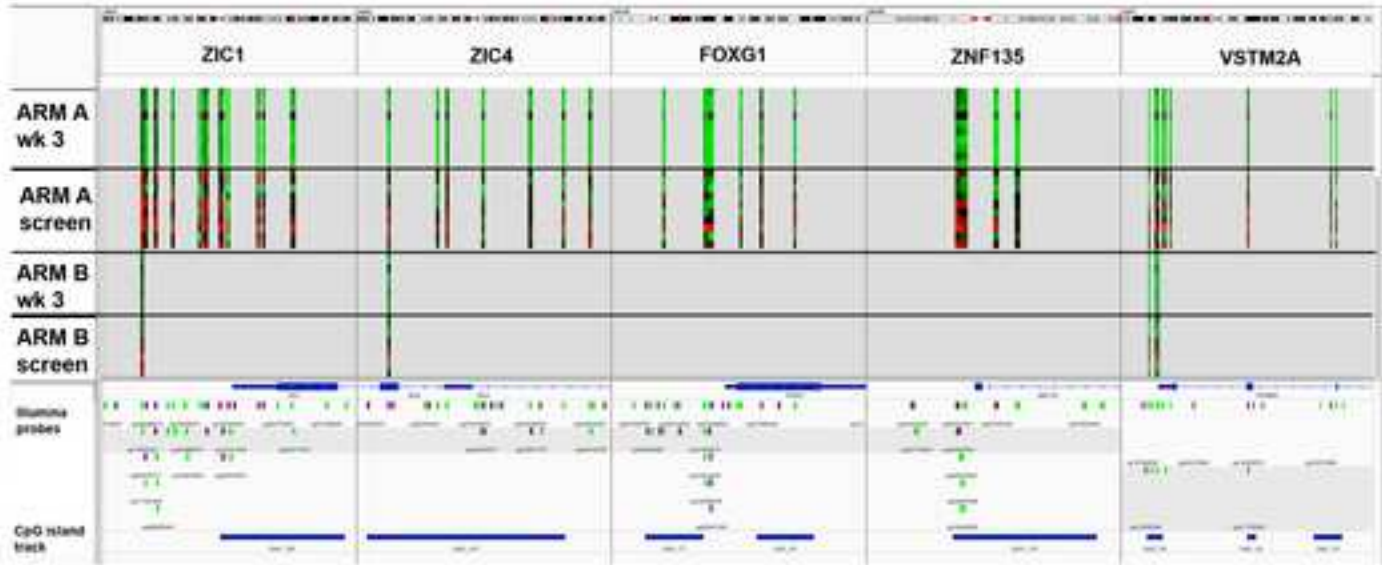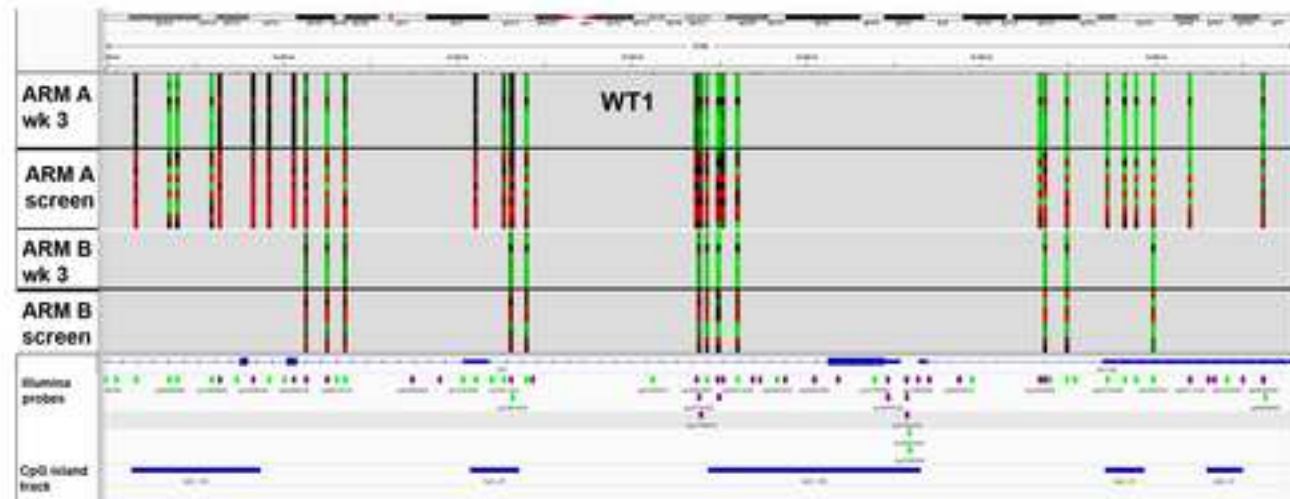

Figure 5.

**Promoter methylation over the course of DADE induction (Arm A)**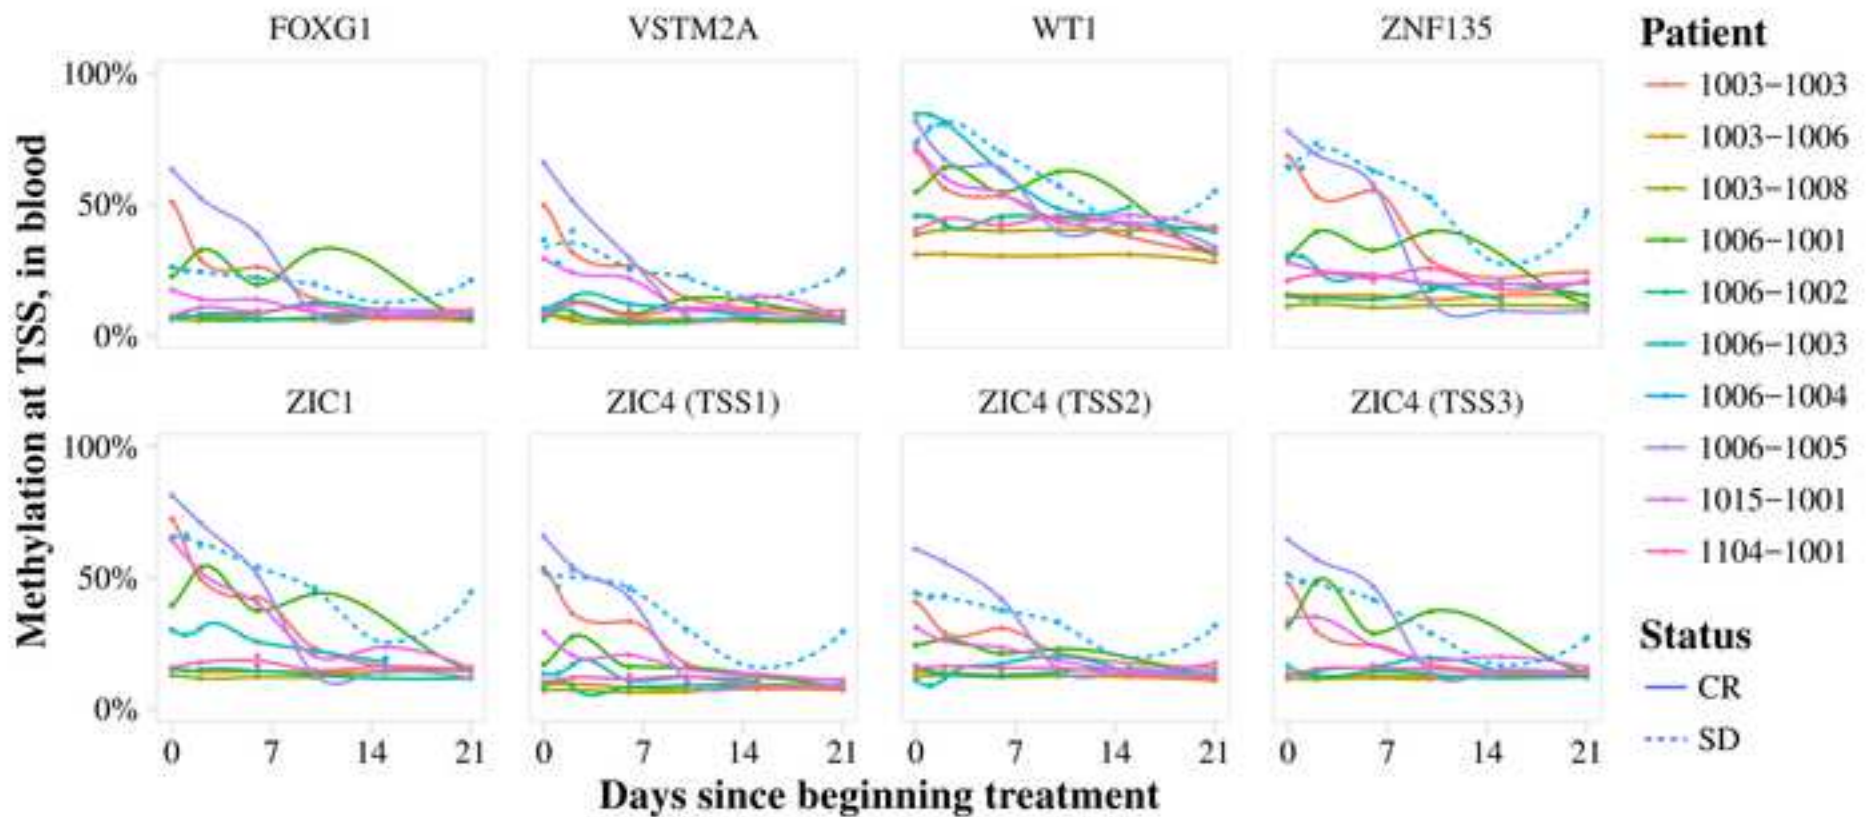

Figure 6.

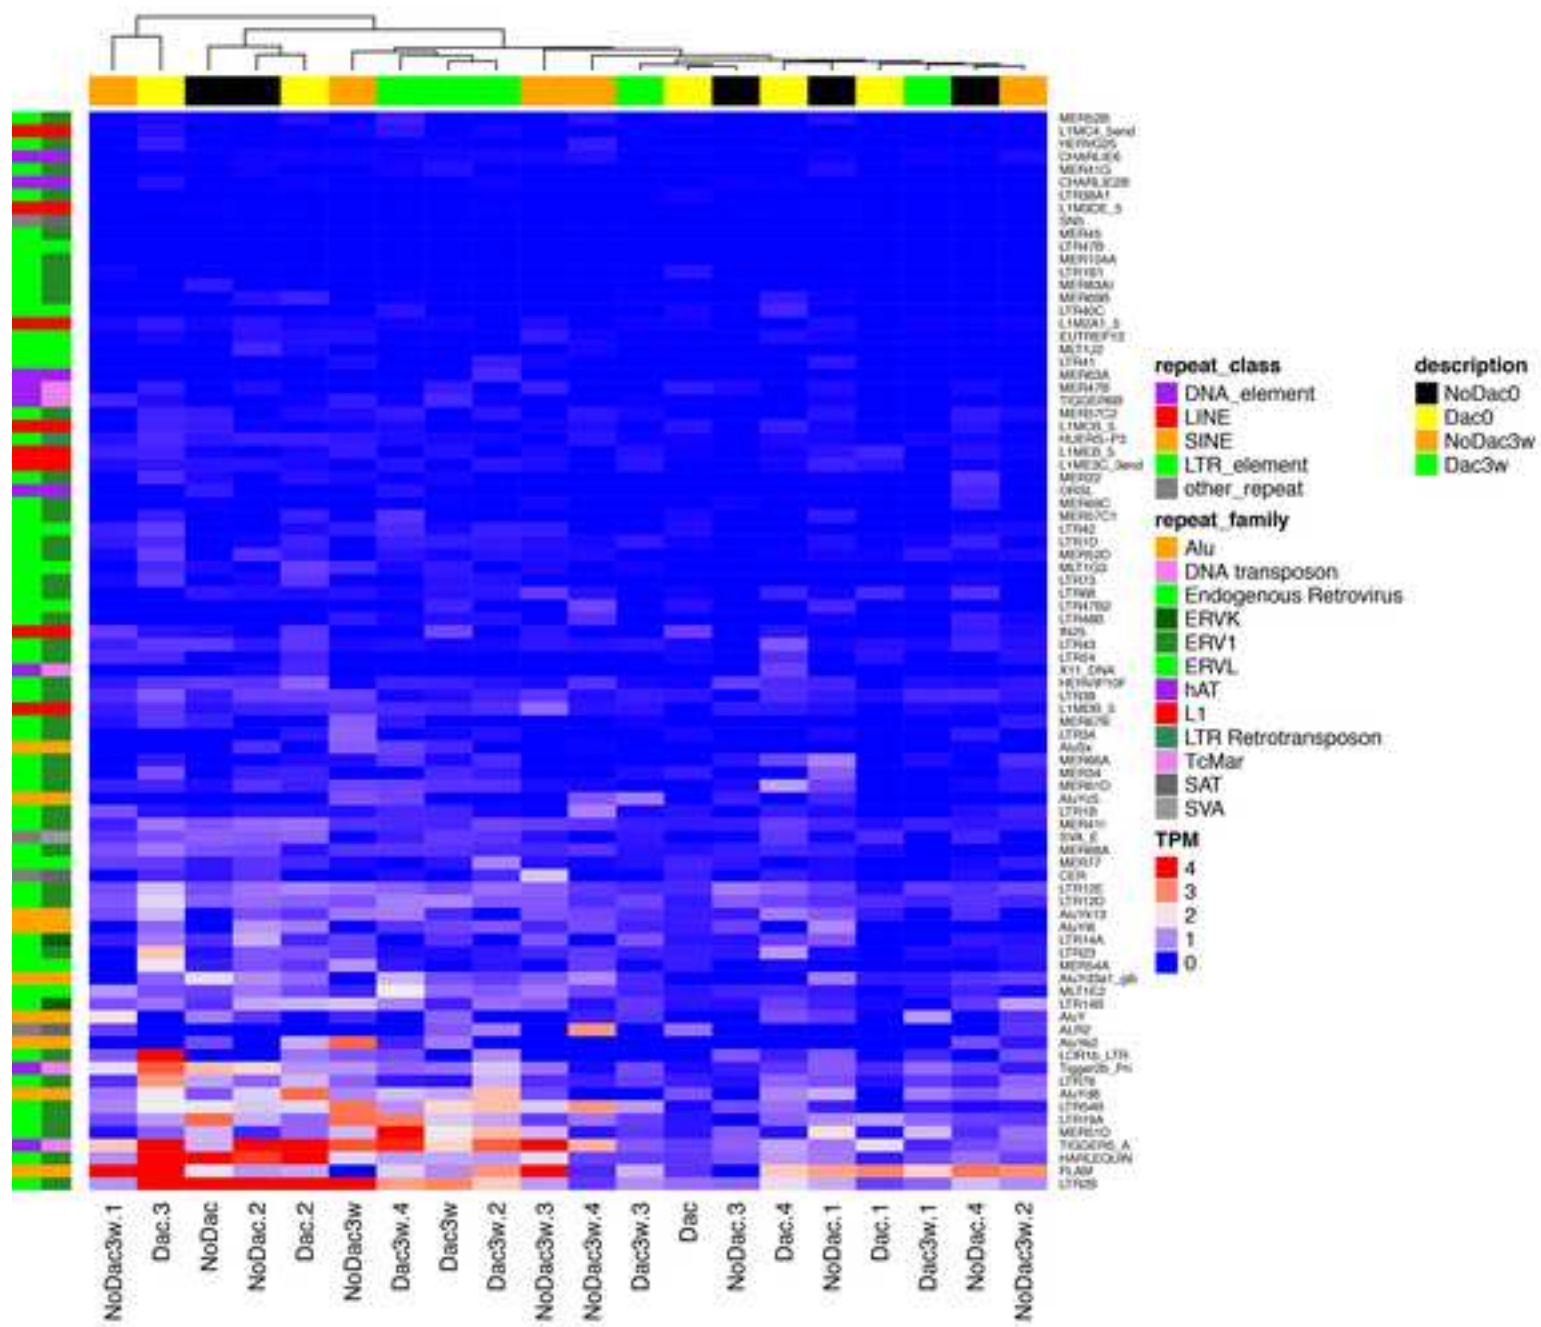

Source: http://biorxiv.org/content/10.1101/124263v1.full.pdf
